# Supplementary material for: Load Bearing Behavior of Stop Bladed Scarf Joint With Cog and Peg
Source: Research Square preprint supplement (doi:10.21203/rs.3.rs-8301441/v1), 2025-12-10
Supplement: Supplementary file 1 [file 54ef99583e1832b079481f7a.xlsx]

## Sheet: Tensile Test
T1					T2					T3																								T1	T2	T3
Length (L) =	202.55	mm			Length (L) =	209.5				Length (L) =	215.552																						Length (L) =	202.55	209.5	215.552	mm
Width (B) =	15.56	mm			Width (B) =	15.78				Width (B) =	15.03																						Width (B) =	15.56	15.78	15.03	mm
Depth (D) =	31.53	mm			Depth (D) =	31.12				Depth (D) =	31.15																						Depth (D) =	31.53	31.12	31.15	mm
Max Stress =	80.6145	N/mm2			Max Stress =	96.1159				Max Stress =	82.2325																						Max Stress =	80.6145	96.1159	82.2325	N/mm2
Respective Strain =	0.0740558				Respective Strain =	0.0825776				Respective Strain =	0.0649495																						Respective Strain =	0.0740558	0.0825776	0.0649495
Elasticity =	1088.56	N/mm2			Elasticity =	1163.95	N/mm2			Elasticity =	1266.1	N/mm2																					Elasticity =	1088.56	1163.95	1266.1	N/mm2
Displacement	Strain	Load(kN)	T1		Displacement	Strain	Load(kN)	T2		Displacement	Strain	Load(kN)	T3
0	0	0.8	1.63063		0	0	0.8	1.62908		0	0	0.8	1.70873	FALSE
0	0	1.85	3.77084		0	0	2.1	4.27634	FALSE	0	0	2.2	4.699	FALSE
0	0	1.9	3.87276		0	0	2.15	4.37816	FALSE	0	0	2.25	4.8058	FALSE
0	0	2	4.07658		0	0	2.25	4.5818	FALSE	0	0	2.3	4.91259	FALSE
0.1	0.000493705	2.05	4.1785		0.2	0.000954654	2.25	4.5818	FALSE	0	0	2.4	5.12618	FALSE
0.1	0.000493705	2.15	4.38233		0.3	0.00143198	2.25	4.5818	FALSE	0	0	2.45	5.23298	FALSE
0.1	0.000493705	2.2	4.48424		0.3	0.00143198	2.3	4.68362	FALSE	0	0	2.55	5.44657	FALSE
0.1	0.000493705	2.3	4.68807		0.3	0.00143198	2.35	4.78543	FALSE	0.1	0.000463925	2.55	5.44657	FALSE
0.6	0.00296223	2.3	4.68807		0.3	0.00143198	2.45	4.98907	FALSE	0.1	0.000463925	2.6	5.55337	FALSE
0.6	0.00296223	2.3	4.68807		0.3	0.00143198	2.5	5.09089	FALSE	0.1	0.000463925	2.75	5.87375	FALSE
0.6	0.00296223	2.35	4.78999		0.3	0.00143198	2.6	5.29452	FALSE	0.3	0.00139178	2.75	5.87375	FALSE
0.6	0.00296223	2.35	4.78999		0.4	0.00190931	2.6	5.29452	FALSE	0.3	0.00139178	2.8	5.98055	FALSE
0.6	0.00296223	2.5	5.09573		0.4	0.00190931	2.65	5.39634	FALSE	0.4	0.0018557	2.8	5.98055	FALSE
0.6	0.00296223	2.55	5.19765		0.4	0.00190931	2.75	5.59998	FALSE	0.4	0.0018557	2.9	6.19414	FALSE
0.6	0.00296223	2.55	5.19765		0.4	0.00190931	2.8	5.70179	FALSE	0.4	0.0018557	2.95	6.30093	FALSE
0.6	0.00296223	2.65	5.40147		0.4	0.00190931	2.85	5.80361	FALSE	0.4	0.0018557	3.05	6.51453	FALSE
0.6	0.00296223	2.7	5.50339		0.4	0.00190931	2.95	6.00725	FALSE	0.4	0.0018557	3.05	6.51453	FALSE
0.6	0.00296223	2.8	5.70722		0.4	0.00190931	3	6.10906	FALSE	0.4	0.0018557	3.1	6.62132	FALSE
0.6	0.00296223	2.8	5.70722		0.5	0.00238663	3.1	6.3127	FALSE	0.4	0.0018557	3.2	6.83491	FALSE
0.6	0.00296223	2.85	5.80913		0.8	0.00381862	3.1	6.3127	FALSE	0.4	0.0018557	3.25	6.94171	FALSE
0.6	0.00296223	2.85	5.80913		0.8	0.00381862	3.15	6.41452	FALSE	0.5	0.00231963	3.35	7.1553	FALSE
0.6	0.00296223	2.9	5.91105		0.8	0.00381862	3.25	6.61815	FALSE	0.5	0.00231963	3.4	7.26209	FALSE
0.6	0.00296223	3	6.11488		0.8	0.00381862	3.3	6.71997	FALSE	0.5	0.00231963	3.45	7.36889	FALSE
0.6	0.00296223	3	6.11488		0.8	0.00381862	3.4	6.92361	FALSE	0.5	0.00231963	3.55	7.58248	FALSE
0.6	0.00296223	3.05	6.21679		0.8	0.00381862	3.45	7.02542	FALSE	0.5	0.00231963	3.55	7.58248	FALSE
0.6	0.00296223	3.05	6.21679		0.8	0.00381862	3.5	7.12724	FALSE	0.6	0.00278355	3.55	7.58248	FALSE
0.6	0.00296223	3.15	6.42062		0.8	0.00381862	3.6	7.33088	FALSE	0.6	0.00278355	3.6	7.68928	FALSE
0.7	0.00345594	3.15	6.42062		0.8	0.00381862	3.65	7.43269	FALSE	0.6	0.00278355	3.6	7.68928	FALSE
0.8	0.00394964	3.15	6.42062		0.8	0.00381862	3.75	7.63633	FALSE	0.7	0.00324748	3.7	7.90287	FALSE
0.8	0.00394964	3.2	6.52253		0.8	0.00381862	3.8	7.73815	FALSE	0.7	0.00324748	3.75	8.00966	FALSE
0.8	0.00394964	3.3	6.72636		0.8	0.00381862	3.9	7.94178	FALSE	0.7	0.00324748	3.85	8.22325	FALSE
0.9	0.00444335	3.3	6.72636		0.8	0.00381862	3.95	8.0436	FALSE	0.8	0.0037114	3.85	8.22325	FALSE
0.9	0.00444335	3.3	6.72636		0.8	0.00381862	4	8.14542	FALSE	0.8	0.0037114	3.9	8.33005	FALSE
1	0.00493705	3.3	6.72636		0.9	0.00429594	4.1	8.34905	FALSE	0.8	0.0037114	3.95	8.43684	FALSE
1	0.00493705	3.3	6.72636		1	0.00477327	4.15	8.45087	FALSE	0.8	0.0037114	4.05	8.65044	FALSE
1	0.00493705	3.3	6.72636		1.1	0.0052506	4.15	8.45087	FALSE	0.8	0.0037114	4.1	8.75723	FALSE
1	0.00493705	3.35	6.82828		1.1	0.0052506	4.25	8.65451	FALSE	0.8	0.0037114	4.1	8.75723	FALSE
1	0.00493705	3.35	6.82828		1.1	0.0052506	4.3	8.75632	FALSE	0.8	0.0037114	4.2	8.97082	FALSE
1	0.00493705	3.4	6.93019		1.2	0.00572792	4.3	8.75632	FALSE	0.8	0.0037114	4.2	8.97082	FALSE
1	0.00493705	3.5	7.13402		1.2	0.00572792	4.4	8.95996	FALSE	0.8	0.0037114	4.25	9.07762	FALSE
1	0.00493705	3.55	7.23594		1.2	0.00572792	4.45	9.06178	FALSE	0.8	0.0037114	4.35	9.29121	FALSE
1	0.00493705	3.65	7.43977		1.2	0.00572792	4.55	9.26541	FALSE	0.8	0.0037114	4.4	9.398	FALSE
1	0.00493705	3.65	7.43977		1.2	0.00572792	4.6	9.36723	FALSE	0.8	0.0037114	4.5	9.6116	FALSE
1.1	0.00543076	3.7	7.54168		1.2	0.00572792	4.65	9.46905	FALSE	0.8	0.0037114	4.5	9.6116	FALSE
1.1	0.00543076	3.8	7.74551		1.2	0.00572792	4.75	9.67268	FALSE	0.8	0.0037114	4.55	9.71839	FALSE
1.1	0.00543076	3.85	7.84742		1.2	0.00572792	4.8	9.7745	FALSE	0.8	0.0037114	4.6	9.82519	FALSE
1.2	0.00592446	3.85	7.84742		1.2	0.00572792	4.9	9.97814	FALSE	0.8	0.0037114	4.7	10.0388	FALSE
1.2	0.00592446	3.95	8.05125		1.3	0.00620525	4.95	10.08	FALSE	0.8	0.0037114	4.7	10.0388	FALSE
1.4	0.00691187	3.95	8.05125		1.3	0.00620525	5.05	10.2836	FALSE	0.9	0.00417533	4.7	10.0388	FALSE
1.4	0.00691187	3.95	8.05125		1.4	0.00668258	5.05	10.2836	FALSE	0.9	0.00417533	4.75	10.1456	FALSE
1.4	0.00691187	4	8.15317		1.5	0.0071599	5.05	10.2836	FALSE	0.9	0.00417533	4.85	10.3592	FALSE
1.4	0.00691187	4	8.15317		1.5	0.0071599	5.1	10.3854	FALSE	0.9	0.00417533	4.85	10.3592	FALSE
1.4	0.00691187	4.05	8.25508		1.6	0.00763723	5.1	10.3854	FALSE	1	0.00463925	4.85	10.3592	FALSE
1.4	0.00691187	4.15	8.45891		1.6	0.00763723	5.15	10.4872	FALSE	1	0.00463925	4.9	10.466	FALSE
1.4	0.00691187	4.2	8.56083		1.6	0.00763723	5.25	10.6909	FALSE	1.1	0.00510318	4.9	10.466	FALSE
1.4	0.00691187	4.3	8.76466		1.6	0.00763723	5.3	10.7927	FALSE	1.1	0.00510318	5	10.6796	FALSE
1.4	0.00691187	4.3	8.76466		1.6	0.00763723	5.4	10.9963	FALSE	1.1	0.00510318	5	10.6796	FALSE
1.4	0.00691187	4.35	8.86657		1.6	0.00763723	5.45	11.0981	FALSE	1.2	0.0055671	5	10.6796	FALSE
1.4	0.00691187	4.45	9.0704		1.6	0.00763723	5.55	11.3018	FALSE	1.2	0.0055671	5.05	10.7863	FALSE
1.4	0.00691187	4.45	9.0704		1.6	0.00763723	5.6	11.4036	FALSE	1.2	0.0055671	5.1	10.8931	FALSE
1.4	0.00691187	4.5	9.17231		1.6	0.00763723	5.65	11.5054	FALSE	1.2	0.0055671	5.2	11.1067	FALSE
1.4	0.00691187	4.55	9.27423		1.6	0.00763723	5.75	11.709	FALSE	1.2	0.0055671	5.2	11.1067	FALSE
1.4	0.00691187	4.55	9.27423		1.6	0.00763723	5.8	11.8109	FALSE	1.2	0.0055671	5.25	11.2135	FALSE
1.4	0.00691187	4.65	9.47806		1.6	0.00763723	5.9	12.0145	FALSE	1.2	0.0055671	5.35	11.4271	FALSE
1.4	0.00691187	4.7	9.57997		1.6	0.00763723	5.95	12.1163	FALSE	1.2	0.0055671	5.35	11.4271	FALSE
1.5	0.00740558	4.7	9.57997		2	0.00954654	5.95	12.1163	FALSE	1.2	0.0055671	5.4	11.5339	FALSE
1.5	0.00740558	4.8	9.7838		2	0.00954654	6.05	12.3199	FALSE	1.2	0.0055671	5.5	11.7475	FALSE
1.5	0.00740558	4.85	9.88572		2	0.00954654	6.1	12.4218	FALSE	1.2	0.0055671	5.55	11.8543	FALSE
1.5	0.00740558	4.95	10.0895		2	0.00954654	6.2	12.6254	FALSE	1.2	0.0055671	5.55	11.8543	FALSE
1.5	0.00740558	5	10.1915		2	0.00954654	6.25	12.7272	FALSE	1.2	0.0055671	5.65	12.0679	FALSE
1.6	0.00789928	5.15	10.4972		2	0.00954654	6.3	12.829	FALSE	1.2	0.0055671	5.65	12.0679	FALSE
1.6	0.00789928	5.2	10.5991		2	0.00954654	6.4	13.0327	FALSE	1.2	0.0055671	5.7	12.1747	FALSE
1.6	0.00789928	5.3	10.8029		2	0.00954654	6.45	13.1345	FALSE	1.2	0.0055671	5.7	12.1747	FALSE
1.6	0.00789928	5.35	10.9049		2	0.00954654	6.55	13.3381	FALSE	1.2	0.0055671	5.7	12.1747	FALSE
1.7	0.00839299	5.35	10.9049		2	0.00954654	6.6	13.4399	FALSE	1.2	0.0055671	5.75	12.2815	FALSE
1.7	0.00839299	5.45	11.1087		2	0.00954654	6.7	13.6436	FALSE	1.2	0.0055671	5.75	12.2815	FALSE
1.7	0.00839299	5.5	11.2106		2	0.00954654	6.75	13.7454	FALSE	1.2	0.0055671	5.85	12.4951	FALSE
1.8	0.00888669	5.6	11.4144		2.1	0.0100239	6.9	14.0508	FALSE	1.2	0.0055671	5.85	12.4951	FALSE
1.8	0.00888669	5.65	11.5164		2.2	0.0105012	6.9	14.0508	FALSE	1.2	0.0055671	5.9	12.6019	FALSE
1.8	0.00888669	5.7	11.6183		2.4	0.0114558	6.95	14.1527	FALSE	1.2	0.0055671	5.9	12.6019	FALSE
1.8	0.00888669	5.8	11.8221		2.4	0.0114558	7.05	14.3563	FALSE	1.3	0.00603103	5.9	12.6019	FALSE
1.8	0.00888669	5.85	11.924		2.4	0.0114558	7.1	14.4581	FALSE	1.4	0.00649495	5.9	12.6019	FALSE
1.8	0.00888669	5.95	12.1278		2.4	0.0114558	7.25	14.7636	FALSE	1.6	0.0074228	6	12.8155	FALSE
2.1	0.0103678	5.95	12.1278		2.4	0.0114558	7.35	14.9672	FALSE	1.6	0.0074228	6	12.8155	FALSE
2.1	0.0103678	6	12.2298		2.4	0.0114558	7.4	15.069	FALSE	1.6	0.0074228	6.05	12.9223	FALSE
2.2	0.0108615	6	12.2298		2.4	0.0114558	7.45	15.1708	FALSE	1.6	0.0074228	6.15	13.1358	FALSE
2.2	0.0108615	6.1	12.4336		2.4	0.0114558	7.6	15.4763	FALSE	1.6	0.0074228	6.2	13.2426	FALSE
2.2	0.0108615	6.1	12.4336		2.5	0.0119332	7.6	15.4763	FALSE	1.6	0.0074228	6.25	13.3494	FALSE
2.2	0.0108615	6.15	12.5355		2.5	0.0119332	7.7	15.6799	FALSE	1.6	0.0074228	6.35	13.563	FALSE
2.2	0.0108615	6.25	12.7393		2.6	0.0124105	7.75	15.7817	FALSE	1.6	0.0074228	6.4	13.6698	FALSE
2.2	0.0108615	6.3	12.8412		2.6	0.0124105	7.85	15.9854	FALSE	1.6	0.0074228	6.5	13.8834	FALSE
2.2	0.0108615	6.35	12.9432		2.7	0.0128878	7.9	16.0872	FALSE	1.6	0.0074228	6.55	13.9902	FALSE
2.2	0.0108615	6.45	13.147		2.7	0.0128878	7.95	16.189	FALSE	1.6	0.0074228	6.55	13.9902	FALSE
2.2	0.0108615	6.5	13.2489		2.8	0.0133652	7.95	16.189	FALSE	1.6	0.0074228	6.65	14.2038	FALSE
2.2	0.0108615	6.6	13.4527		2.8	0.0133652	8.05	16.3927	FALSE	1.6	0.0074228	6.7	14.3106	FALSE
2.2	0.0108615	6.65	13.5546		2.8	0.0133652	8.1	16.4945	FALSE	1.6	0.0074228	6.75	14.4174	FALSE
2.3	0.0113552	6.65	13.5546		2.8	0.0133652	8.2	16.6981	FALSE	1.6	0.0074228	6.85	14.631	FALSE
2.4	0.0118489	6.75	13.7585		2.8	0.0133652	8.25	16.7999	FALSE	1.6	0.0074228	6.9	14.7378	FALSE
2.4	0.0118489	6.8	13.8604		2.8	0.0133652	8.35	17.0036	FALSE	1.6	0.0074228	7	14.9514	FALSE
2.5	0.0123426	6.8	13.8604		2.8	0.0133652	8.4	17.1054	FALSE	1.6	0.0074228	7.05	15.0582	FALSE
2.5	0.0123426	6.8	13.8604		2.8	0.0133652	8.5	17.309	FALSE	1.6	0.0074228	7.15	15.2718	FALSE
2.6	0.0128363	6.8	13.8604		2.8	0.0133652	8.55	17.4108	FALSE	1.6	0.0074228	7.2	15.3786	FALSE
2.6	0.0128363	6.85	13.9623		2.8	0.0133652	8.6	17.5126	FALSE	1.6	0.0074228	7.3	15.5921	FALSE
2.6	0.0128363	6.85	13.9623		2.8	0.0133652	8.7	17.7163	FALSE	1.6	0.0074228	7.35	15.6989	FALSE
2.6	0.0128363	6.85	13.9623		2.8	0.0133652	8.75	17.8181	FALSE	1.7	0.00788673	7.4	15.8057	FALSE
2.6	0.0128363	6.85	13.9623		2.8	0.0133652	8.85	18.0217	FALSE	1.7	0.00788673	7.5	16.0193	FALSE
2.6	0.0128363	6.95	14.1661		2.8	0.0133652	8.9	18.1236	FALSE	1.7	0.00788673	7.55	16.1261	FALSE
2.6	0.0128363	6.95	14.1661		2.8	0.0133652	9	18.3272	FALSE	1.7	0.00788673	7.65	16.3397	FALSE
2.6	0.0128363	6.95	14.1661		2.9	0.0138425	9	18.3272	FALSE	1.7	0.00788673	7.65	16.3397	FALSE
2.6	0.0128363	7	14.268		2.9	0.0138425	9.05	18.429	FALSE	1.7	0.00788673	7.7	16.4465	FALSE
2.6	0.0128363	7	14.268		2.9	0.0138425	9.1	18.5308	FALSE	1.7	0.00788673	7.8	16.6601	FALSE
2.6	0.0128363	7.1	14.4719		3	0.0143198	9.1	18.5308	FALSE	1.7	0.00788673	7.85	16.7669	FALSE
2.6	0.0128363	7.1	14.4719		3	0.0143198	9.2	18.7345	FALSE	1.9	0.00881458	7.85	16.7669	FALSE
2.6	0.0128363	7.15	14.5738		3.1	0.0147971	9.25	18.8363	FALSE	1.9	0.00881458	7.9	16.8737	FALSE
2.6	0.0128363	7.25	14.7776		3.1	0.0147971	9.35	19.0399	FALSE	1.9	0.00881458	7.9	16.8737	FALSE
2.6	0.0128363	7.3	14.8795		3.2	0.0152745	9.35	19.0399	FALSE	2	0.0092785	7.9	16.8737	FALSE
2.6	0.0128363	7.35	14.9814		3.2	0.0152745	9.4	19.1417	FALSE	2	0.0092785	8	17.0873	FALSE
2.6	0.0128363	7.45	15.1853		3.3	0.0157518	9.4	19.1417	FALSE	2	0.0092785	8.05	17.1941	FALSE
2.7	0.01333	7.45	15.1853		3.3	0.0157518	9.5	19.3454	FALSE	2	0.0092785	8.15	17.4077	FALSE
2.7	0.01333	7.5	15.2872		3.3	0.0157518	9.55	19.4472	FALSE	2	0.0092785	8.2	17.5145	FALSE
2.7	0.01333	7.6	15.491		3.3	0.0157518	9.65	19.6508	FALSE	2	0.0092785	8.3	17.7281	FALSE
2.8	0.0138237	7.6	15.491		3.3	0.0157518	9.7	19.7526	FALSE	2	0.0092785	8.35	17.8348	FALSE
2.9	0.0143175	7.65	15.5929		3.3	0.0157518	9.75	19.8545	FALSE	2	0.0092785	8.45	18.0484	FALSE
2.9	0.0143175	7.65	15.5929		3.3	0.0157518	9.9	20.1599	FALSE	2	0.0092785	8.5	18.1552	FALSE
2.9	0.0143175	7.75	15.7968		3.4	0.0162291	10	20.3635	FALSE	2.1	0.00974243	8.5	18.1552	FALSE
3	0.0148112	7.75	15.7968		3.4	0.0162291	10.05	20.4654	FALSE	2.1	0.00974243	8.55	18.262	FALSE
3	0.0148112	7.8	15.8987		3.4	0.0162291	10.15	20.669	FALSE	2.1	0.00974243	8.65	18.4756	FALSE
3	0.0148112	7.8	15.8987		3.4	0.0162291	10.2	20.7708	FALSE	2.2	0.0102064	8.65	18.4756	FALSE
3	0.0148112	7.9	16.1025		3.4	0.0162291	10.25	20.8726	FALSE	2.3	0.0106703	8.7	18.5824	FALSE
3	0.0148112	7.95	16.2044		3.4	0.0162291	10.35	21.0763	FALSE	2.4	0.0111342	8.7	18.5824	FALSE
3	0.0148112	8	16.3063		3.5	0.0167064	10.4	21.1781	FALSE	2.4	0.0111342	8.8	18.796	FALSE
3	0.0148112	8.1	16.5102		3.5	0.0167064	10.5	21.3817	FALSE	2.4	0.0111342	8.85	18.9028	FALSE
3	0.0148112	8.15	16.6121		3.5	0.0167064	10.55	21.4835	FALSE	2.4	0.0111342	8.95	19.1164	FALSE
3	0.0148112	8.25	16.8159		3.6	0.0171838	10.55	21.4835	FALSE	2.4	0.0111342	9	19.2232	FALSE
3	0.0148112	8.3	16.9178		3.6	0.0171838	10.65	21.6872	FALSE	2.4	0.0111342	9	19.2232	FALSE
3	0.0148112	8.4	17.1217		3.6	0.0171838	10.7	21.789	FALSE	2.4	0.0111342	9.05	19.33	FALSE
3	0.0148112	8.45	17.2236		3.6	0.0171838	10.75	21.8908	FALSE	2.4	0.0111342	9.15	19.5436	FALSE
3	0.0148112	8.5	17.3255		3.6	0.0171838	10.85	22.0944	FALSE	2.4	0.0111342	9.2	19.6504	FALSE
3.1	0.0153049	8.6	17.5293		3.6	0.0171838	10.9	22.1963	FALSE	2.4	0.0111342	9.3	19.864	FALSE
3.2	0.0157986	8.6	17.5293		3.6	0.0171838	11	22.3999	FALSE	2.4	0.0111342	9.35	19.9708	FALSE
3.2	0.0157986	8.65	17.6312		3.6	0.0171838	11.05	22.5017	FALSE	2.4	0.0111342	9.45	20.1844	FALSE
3.3	0.0162923	8.65	17.6312		4	0.0190931	11.05	22.5017	FALSE	2.4	0.0111342	9.5	20.2911	FALSE
3.3	0.0162923	8.75	17.8351		4	0.0190931	11.15	22.7054	FALSE	2.4	0.0111342	9.5	20.2911	FALSE
3.3	0.0162923	8.75	17.8351		4	0.0190931	11.2	22.8072	FALSE	2.4	0.0111342	9.6	20.5047	FALSE
3.4	0.016786	8.75	17.8351		4	0.0190931	11.3	23.0108	FALSE	2.4	0.0111342	9.6	20.5047	FALSE
3.4	0.016786	8.8	17.937		4	0.0190931	11.35	23.1126	FALSE	2.4	0.0111342	9.65	20.6115	FALSE
3.4	0.016786	8.9	18.1408		4	0.0190931	11.4	23.2144	FALSE	2.4	0.0111342	9.7	20.7183	FALSE
3.5	0.0172797	8.9	18.1408		4	0.0190931	11.5	23.4181	FALSE	2.4	0.0111342	9.8	20.9319	FALSE
3.6	0.0177734	8.95	18.2427		4	0.0190931	11.55	23.5199	FALSE	2.4	0.0111342	9.85	21.0387	FALSE
3.7	0.0182671	9.05	18.4465		4	0.0190931	11.65	23.7235	FALSE	2.5	0.0115981	9.85	21.0387	FALSE
3.7	0.0182671	9.05	18.4465		4	0.0190931	11.7	23.8253	FALSE	2.6	0.0120621	9.85	21.0387	FALSE
3.8	0.0187608	9.15	18.6504		4	0.0190931	11.8	24.029	FALSE	2.7	0.012526	9.95	21.2523	FALSE
3.8	0.0187608	9.15	18.6504		4	0.0190931	11.85	24.1308	FALSE	2.7	0.012526	9.95	21.2523	FALSE
3.8	0.0187608	9.25	18.8542		4	0.0190931	11.9	24.2326	FALSE	2.8	0.0129899	9.95	21.2523	FALSE
3.8	0.0187608	9.3	18.9561		4.4	0.0210024	11.9	24.2326	FALSE	2.8	0.0129899	9.95	21.2523	FALSE
3.8	0.0187608	9.4	19.1599		4.4	0.0210024	12	24.4363	FALSE	2.8	0.0129899	10	21.3591	FALSE
3.8	0.0187608	9.4	19.1599		4.4	0.0210024	12.05	24.5381	FALSE	2.8	0.0129899	10	21.3591	FALSE
3.8	0.0187608	9.45	19.2619		4.4	0.0210024	12.15	24.7417	FALSE	3.2	0.0148456	10	21.3591	FALSE
3.8	0.0187608	9.55	19.4657		4.4	0.0210024	12.2	24.8435	FALSE	3.2	0.0148456	10.1	21.5727	FALSE
3.8	0.0187608	9.6	19.5676		4.4	0.0210024	12.3	25.0472	FALSE	3.2	0.0148456	10.15	21.6795	FALSE
3.8	0.0187608	9.65	19.6695		4.4	0.0210024	12.35	25.149	FALSE	3.2	0.0148456	10.2	21.7863	FALSE
3.8	0.0187608	9.75	19.8733		4.4	0.0210024	12.45	25.3526	FALSE	3.2	0.0148456	10.3	21.9999	FALSE
3.8	0.0187608	9.8	19.9753		4.4	0.0210024	12.5	25.4544	FALSE	3.2	0.0148456	10.35	22.1067	FALSE
3.8	0.0187608	9.9	20.1791		4.4	0.0210024	12.55	25.5563	FALSE	3.2	0.0148456	10.45	22.3203	FALSE
3.9	0.0192545	9.9	20.1791		4.4	0.0210024	12.65	25.7599	FALSE	3.2	0.0148456	10.5	22.4271	FALSE
3.9	0.0192545	9.95	20.281		4.4	0.0210024	12.7	25.8617	FALSE	3.2	0.0148456	10.6	22.6406	FALSE
4	0.0197482	9.95	20.281		4.8	0.0229117	12.8	26.0653	FALSE	3.2	0.0148456	10.65	22.7474	FALSE
4	0.0197482	10.05	20.4848		4.8	0.0229117	12.85	26.1672	FALSE	3.2	0.0148456	10.75	22.961	FALSE
4.1	0.0202419	10.05	20.4848		4.8	0.0229117	12.95	26.3708	FALSE	3.2	0.0148456	10.8	23.0678	FALSE
4.1	0.0202419	10.05	20.4848		4.8	0.0229117	13	26.4726	FALSE	3.2	0.0148456	10.85	23.1746	FALSE
4.1	0.0202419	10.1	20.5868		4.8	0.0229117	13.05	26.5744	FALSE	3.2	0.0148456	10.95	23.3882	FALSE
4.1	0.0202419	10.2	20.7906		4.8	0.0229117	13.15	26.7781	FALSE	3.2	0.0148456	11	23.495	FALSE
4.2	0.0207356	10.2	20.7906		4.8	0.0229117	13.2	26.8799	FALSE	3.2	0.0148456	11.1	23.7086	FALSE
4.2	0.0207356	10.25	20.8925		4.8	0.0229117	13.3	27.0835	FALSE	3.3	0.0153095	11.1	23.7086	FALSE
4.2	0.0207356	10.25	20.8925		4.8	0.0229117	13.35	27.1853	FALSE	3.3	0.0153095	11.15	23.8154	FALSE
4.2	0.0207356	10.3	20.9944		4.8	0.0229117	13.45	27.389	FALSE	3.3	0.0153095	11.3	24.1358	FALSE
4.2	0.0207356	10.3	20.9944		4.8	0.0229117	13.5	27.4908	FALSE	3.3	0.0153095	11.35	24.2426	FALSE
4.2	0.0207356	10.3	20.9944		4.8	0.0229117	13.6	27.6944	FALSE	3.3	0.0153095	11.45	24.4562	FALSE
4.2	0.0207356	10.3	20.9944		4.8	0.0229117	13.65	27.7962	FALSE	3.3	0.0153095	11.5	24.563	FALSE
4.2	0.0207356	10.4	21.1982		4.8	0.0229117	13.7	27.8981	FALSE	3.3	0.0153095	11.6	24.7766	FALSE
4.2	0.0207356	10.4	21.1982		4.8	0.0229117	13.8	28.1017	FALSE	3.3	0.0153095	11.65	24.8834	FALSE
4.2	0.0207356	10.45	21.3002		4.8	0.0229117	13.85	28.2035	FALSE	3.4	0.0157735	11.65	24.8834	FALSE
4.3	0.0212293	10.45	21.3002		4.9	0.023389	13.85	28.2035	FALSE	3.4	0.0157735	11.75	25.0969	FALSE
4.3	0.0212293	10.55	21.504		4.9	0.023389	14	28.509	FALSE	3.4	0.0157735	11.8	25.2037	FALSE
4.4	0.021723	10.55	21.504		5	0.0238663	14	28.509	FALSE	3.5	0.0162374	11.85	25.3105	FALSE
4.4	0.021723	10.6	21.6059		5	0.0238663	14.1	28.7126	FALSE	3.6	0.0167013	11.85	25.3105	FALSE
4.5	0.0222167	10.6	21.6059		5	0.0238663	14.15	28.8144	FALSE	3.6	0.0167013	11.95	25.5241	FALSE
4.5	0.0222167	10.6	21.6059		5.1	0.0243437	14.15	28.8144	FALSE	3.6	0.0167013	12	25.6309	FALSE
4.5	0.0222167	10.7	21.8097		5.1	0.0243437	14.2	28.9162	FALSE	3.6	0.0167013	12.1	25.8445	FALSE
4.6	0.0227104	10.7	21.8097		5.1	0.0243437	14.3	29.1199	FALSE	3.6	0.0167013	12.15	25.9513	FALSE
4.6	0.0227104	10.75	21.9116		5.1	0.0243437	14.35	29.2217	FALSE	3.6	0.0167013	12.25	26.1649	FALSE
4.6	0.0227104	10.8	22.0136		5.1	0.0243437	14.45	29.4253	FALSE	3.6	0.0167013	12.3	26.2717	FALSE
4.6	0.0227104	10.9	22.2174		5.2	0.024821	14.45	29.4253	FALSE	3.6	0.0167013	12.4	26.4853	FALSE
4.6	0.0227104	10.95	22.3193		5.2	0.024821	14.5	29.5271	FALSE	3.6	0.0167013	12.4	26.4853	FALSE
4.6	0.0227104	11.05	22.5231		5.2	0.024821	14.6	29.7308	FALSE	4	0.018557	12.4	26.4853	FALSE
4.6	0.0227104	11.1	22.625		5.2	0.024821	14.65	29.8326	FALSE	4	0.018557	12.45	26.5921	FALSE
4.6	0.0227104	11.2	22.8289		5.2	0.024821	14.7	29.9344	FALSE	4	0.018557	12.5	26.6989	FALSE
4.6	0.0227104	11.35	23.1346		5.2	0.024821	14.8	30.138	FALSE	4	0.018557	12.6	26.9125	FALSE
4.6	0.0227104	11.4	23.2365		5.2	0.024821	14.85	30.2399	FALSE	4	0.018557	12.65	27.0193	FALSE
4.6	0.0227104	11.45	23.3384		5.2	0.024821	14.95	30.4435	FALSE	4	0.018557	12.75	27.2329	FALSE
5	0.0246853	11.45	23.3384		5.2	0.024821	15	30.5453	FALSE	4	0.018557	12.8	27.3396	FALSE
5	0.0246853	11.55	23.5423		5.2	0.024821	15.1	30.749	FALSE	4	0.018557	12.9	27.5532	FALSE
5	0.0246853	11.6	23.6442		5.2	0.024821	15.15	30.8508	FALSE	4	0.018557	12.95	27.66	FALSE
5	0.0246853	11.7	23.848		5.2	0.024821	15.3	31.1562	FALSE	4	0.018557	13	27.7668	FALSE
5	0.0246853	11.75	23.9499		5.2	0.024821	15.35	31.258	FALSE	4	0.018557	13.1	27.9804	FALSE
5	0.0246853	11.75	23.9499		5.2	0.024821	15.45	31.4617	FALSE	4	0.018557	13.15	28.0872	FALSE
5	0.0246853	11.85	24.1538		5.2	0.024821	15.5	31.5635	FALSE	4	0.018557	13.25	28.3008	FALSE
5	0.0246853	11.9	24.2557		5.2	0.024821	15.6	31.7671	FALSE	4	0.018557	13.3	28.4076	FALSE
5	0.0246853	11.95	24.3576		5.2	0.024821	15.65	31.8689	FALSE	4	0.018557	13.4	28.6212	FALSE
5	0.0246853	12.05	24.5614		5.2	0.024821	15.75	32.0726	FALSE	4	0.018557	13.45	28.728	FALSE
5	0.0246853	12.1	24.6633		5.6	0.0267303	15.85	32.2762	FALSE	4	0.018557	13.55	28.9416	FALSE
5	0.0246853	12.2	24.8672		5.6	0.0267303	15.95	32.4799	FALSE	4.1	0.0190209	13.6	29.0484	FALSE
5	0.0246853	12.25	24.9691		5.6	0.0267303	16	32.5817	FALSE	4.1	0.0190209	13.65	29.1552	FALSE
5	0.0246853	12.35	25.1729		5.6	0.0267303	16.1	32.7853	FALSE	4.1	0.0190209	13.75	29.3688	FALSE
5	0.0246853	12.4	25.2748		5.6	0.0267303	16.15	32.8871	FALSE	4.2	0.0194849	13.75	29.3688	FALSE
5	0.0246853	12.45	25.3767		5.6	0.0267303	16.25	33.0908	FALSE	4.2	0.0194849	13.9	29.6892	FALSE
5	0.0246853	12.55	25.5806		6	0.0286396	16.25	33.0908	FALSE	4.3	0.0199488	13.9	29.6892	FALSE
5	0.0246853	12.6	25.6825		6	0.0286396	16.3	33.1926	FALSE	4.4	0.0204127	13.95	29.7959	FALSE
5	0.0246853	12.7	25.8863		6	0.0286396	16.4	33.3962	FALSE	4.4	0.0204127	14.05	30.0095	FALSE
5	0.0246853	12.75	25.9882		6	0.0286396	16.45	33.498	FALSE	4.4	0.0204127	14.1	30.1163	FALSE
5	0.0246853	12.85	26.1921		6	0.0286396	16.5	33.5999	FALSE	4.4	0.0204127	14.1	30.1163	FALSE
5.1	0.025179	12.85	26.1921		6	0.0286396	16.6	33.8035	FALSE	4.4	0.0204127	14.15	30.2231	FALSE
5.1	0.025179	12.9	26.294		6	0.0286396	16.65	33.9053	FALSE	4.4	0.0204127	14.25	30.4367	FALSE
5.2	0.0256727	13	26.4978		6	0.0286396	16.75	34.1089	FALSE	4.4	0.0204127	14.3	30.5435	FALSE
5.3	0.0261664	13.05	26.5997		6	0.0286396	16.9	34.4144	FALSE	4.4	0.0204127	14.4	30.7571	FALSE
5.3	0.0261664	13.1	26.7016		6	0.0286396	16.95	34.5162	FALSE	4.4	0.0204127	14.45	30.8639	FALSE
5.4	0.0266601	13.1	26.7016		6	0.0286396	17	34.618	FALSE	4.4	0.0204127	14.55	31.0775	FALSE
5.4	0.0266601	13.2	26.9055		6	0.0286396	17.1	34.8217	FALSE	4.4	0.0204127	14.6	31.1843	FALSE
5.4	0.0266601	13.25	27.0074		6	0.0286396	17.15	34.9235	FALSE	4.4	0.0204127	14.6	31.1843	FALSE
5.4	0.0266601	13.35	27.2112		6	0.0286396	17.25	35.1271	FALSE	4.4	0.0204127	14.7	31.3979	FALSE
5.4	0.0266601	13.4	27.3131		6	0.0286396	17.4	35.4326	FALSE	4.4	0.0204127	14.75	31.5047	FALSE
5.4	0.0266601	13.5	27.5169		6	0.0286396	17.45	35.5344	FALSE	4.4	0.0204127	14.75	31.5047	FALSE
5.4	0.0266601	13.55	27.6189		6	0.0286396	17.55	35.738	FALSE	4.4	0.0204127	14.8	31.6115	FALSE
5.4	0.0266601	13.6	27.7208		6.4	0.0305489	17.55	35.738	FALSE	4.5	0.0208766	14.8	31.6115	FALSE
5.4	0.0266601	13.7	27.9246		6.4	0.0305489	17.65	35.9417	FALSE	4.5	0.0208766	14.9	31.8251	FALSE
5.4	0.0266601	13.75	28.0265		6.4	0.0305489	17.75	36.1453	FALSE	4.6	0.0213406	14.9	31.8251	FALSE
5.4	0.0266601	13.85	28.2303		6.4	0.0305489	17.8	36.2471	FALSE	4.6	0.0213406	14.95	31.9319	FALSE
5.4	0.0266601	13.9	28.3323		6.4	0.0305489	17.9	36.4507	FALSE	4.7	0.0218045	15.05	32.1454	FALSE
5.4	0.0266601	14	28.5361		6.4	0.0305489	18.05	36.7562	FALSE	4.7	0.0218045	15.05	32.1454	FALSE
5.4	0.0266601	14.05	28.638		6.4	0.0305489	18.1	36.858	FALSE	4.8	0.0222684	15.05	32.1454	FALSE
5.5	0.0271538	14.05	28.638		6.4	0.0305489	18.15	36.9598	FALSE	4.8	0.0222684	15.05	32.1454	FALSE
5.5	0.0271538	14.15	28.8418		6.4	0.0305489	18.25	37.1635	FALSE	4.8	0.0222684	15.1	32.2522	FALSE
5.6	0.0276475	14.2	28.9437		6.4	0.0305489	18.3	37.2653	FALSE	4.8	0.0222684	15.2	32.4658	FALSE
5.8	0.0286349	14.25	29.0457		6.4	0.0305489	18.4	37.4689	FALSE	4.8	0.0222684	15.2	32.4658	FALSE
5.8	0.0286349	14.35	29.2495		6.6	0.0315036	18.45	37.5707	FALSE	4.8	0.0222684	15.25	32.5726	FALSE
5.8	0.0286349	14.4	29.3514		6.7	0.0319809	18.55	37.7744	FALSE	4.8	0.0222684	15.3	32.6794	FALSE
5.8	0.0286349	14.5	29.5552		6.8	0.0324582	18.6	37.8762	FALSE	4.8	0.0222684	15.4	32.893	FALSE
5.8	0.0286349	14.55	29.6572		6.8	0.0324582	18.7	38.0798	FALSE	4.8	0.0222684	15.45	32.9998	FALSE
5.8	0.0286349	14.65	29.861		6.8	0.0324582	18.75	38.1816	FALSE	4.8	0.0222684	15.55	33.2134	FALSE
5.8	0.0286349	14.7	29.9629		6.8	0.0324582	18.8	38.2835	FALSE	4.8	0.0222684	15.6	33.3202	FALSE
5.8	0.0286349	14.75	30.0648		6.8	0.0324582	18.9	38.4871	FALSE	4.8	0.0222684	15.7	33.5338	FALSE
5.8	0.0286349	14.85	30.2686		6.8	0.0324582	18.95	38.5889	FALSE	4.8	0.0222684	15.75	33.6406	FALSE
5.8	0.0286349	14.9	30.3706		6.8	0.0324582	19.05	38.7926	FALSE	4.8	0.0222684	15.8	33.7474	FALSE
5.8	0.0286349	15	30.5744		6.8	0.0324582	19.1	38.8944	FALSE	4.8	0.0222684	15.9	33.961	FALSE
5.9	0.0291286	15.05	30.6763		6.8	0.0324582	19.2	39.098	FALSE	4.8	0.0222684	15.95	34.0678	FALSE
5.9	0.0291286	15.15	30.8801		6.8	0.0324582	19.25	39.1998	FALSE	4.8	0.0222684	16.05	34.2814	FALSE
6	0.0296223	15.15	30.8801		6.8	0.0324582	19.3	39.3016	FALSE	4.8	0.0222684	16.1	34.3882	FALSE
6	0.0296223	15.2	30.982		6.8	0.0324582	19.45	39.6071	FALSE	4.8	0.0222684	16.2	34.6017	FALSE
6	0.0296223	15.3	31.1859		6.8	0.0324582	19.55	39.8107	FALSE	4.8	0.0222684	16.25	34.7085	FALSE
6.3	0.0311034	15.3	31.1859		6.8	0.0324582	19.6	39.9126	FALSE	4.8	0.0222684	16.35	34.9221	FALSE
6.4	0.0315971	15.3	31.1859		6.8	0.0324582	19.7	40.1162	FALSE	4.8	0.0222684	16.4	35.0289	FALSE
6.4	0.0315971	15.35	31.2878		7.2	0.0343675	19.7	40.1162	FALSE	4.9	0.0227323	16.4	35.0289	FALSE
6.5	0.0320908	15.35	31.2878		7.2	0.0343675	19.75	40.218	FALSE	4.9	0.0227323	16.55	35.3493	FALSE
6.6	0.0325845	15.35	31.2878		7.2	0.0343675	19.8	40.3198	FALSE	5.2	0.0241241	16.6	35.4561	FALSE
6.6	0.0325845	15.4	31.3897		7.2	0.0343675	19.9	40.5235	FALSE	5.2	0.0241241	16.6	35.4561	FALSE
6.6	0.0325845	15.4	31.3897		7.2	0.0343675	19.95	40.6253	FALSE	5.2	0.0241241	16.7	35.6697	FALSE
6.6	0.0325845	15.5	31.5935		7.2	0.0343675	20.05	40.8289	FALSE	5.2	0.0241241	16.75	35.7765	FALSE
6.6	0.0325845	15.55	31.6954		7.2	0.0343675	20.1	40.9307	FALSE	5.2	0.0241241	16.85	35.9901	FALSE
6.6	0.0325845	15.65	31.8993		7.2	0.0343675	20.2	41.1344	FALSE	5.2	0.0241241	16.9	36.0969	FALSE
6.6	0.0325845	15.7	32.0012		7.2	0.0343675	20.25	41.2362	FALSE	5.2	0.0241241	16.95	36.2037	FALSE
6.6	0.0325845	15.8	32.205		7.2	0.0343675	20.35	41.4398	FALSE	5.2	0.0241241	17.05	36.4173	FALSE
6.6	0.0325845	15.85	32.3069		7.2	0.0343675	20.4	41.5416	FALSE	5.2	0.0241241	17.1	36.5241	FALSE
6.6	0.0325845	15.9	32.4088		7.2	0.0343675	20.45	41.6435	FALSE	5.2	0.0241241	17.2	36.7377	FALSE
6.6	0.0325845	16	32.6127		7.2	0.0343675	20.55	41.8471	FALSE	5.2	0.0241241	17.25	36.8444	FALSE
6.6	0.0325845	16.05	32.7146		7.2	0.0343675	20.6	41.9489	FALSE	5.2	0.0241241	17.35	37.058	FALSE
6.6	0.0325845	16.15	32.9184		7.2	0.0343675	20.7	42.1525	FALSE	5.2	0.0241241	17.4	37.1648	FALSE
6.6	0.0325845	16.2	33.0203		7.2	0.0343675	20.75	42.2544	FALSE	5.2	0.0241241	17.4	37.1648	FALSE
6.6	0.0325845	16.3	33.2242		7.2	0.0343675	20.85	42.458	FALSE	5.2	0.0241241	17.5	37.3784	FALSE
6.6	0.0325845	16.35	33.3261		7.2	0.0343675	20.9	42.5598	FALSE	5.2	0.0241241	17.55	37.4852	FALSE
6.6	0.0325845	16.4	33.428		7.6	0.0362768	20.95	42.6616	FALSE	5.2	0.0241241	17.6	37.592	FALSE
6.6	0.0325845	16.5	33.6318		7.6	0.0362768	21.05	42.8653	FALSE	5.2	0.0241241	17.7	37.8056	FALSE
7	0.0345594	16.5	33.6318		7.6	0.0362768	21.1	42.9671	FALSE	5.2	0.0241241	17.75	37.9124	FALSE
7	0.0345594	16.55	33.7337		7.6	0.0362768	21.2	43.1707	FALSE	5.2	0.0241241	17.75	37.9124	FALSE
7	0.0345594	16.65	33.9376		7.6	0.0362768	21.25	43.2725	FALSE	5.3	0.024588	17.75	37.9124	FALSE
7	0.0345594	16.7	34.0395		7.6	0.0362768	21.35	43.4762	FALSE	5.3	0.024588	17.85	38.126	FALSE
7	0.0345594	16.8	34.2433		7.6	0.0362768	21.4	43.578	FALSE	5.3	0.024588	17.9	38.2328	FALSE
7	0.0345594	16.95	34.5491		7.7	0.0367542	21.5	43.7816	FALSE	5.3	0.024588	18	38.4464	FALSE
7	0.0345594	17	34.651		7.7	0.0367542	21.55	43.8834	FALSE	5.4	0.025052	18.05	38.5532	FALSE
7	0.0345594	17.05	34.7529		7.7	0.0367542	21.6	43.9853	FALSE	5.6	0.0259798	18.2	38.8736	FALSE
7	0.0345594	17.15	34.9567		7.7	0.0367542	21.7	44.1889	FALSE	6	0.0278355	18.2	38.8736	FALSE
7	0.0345594	17.2	35.0586		7.8	0.0372315	21.7	44.1889	FALSE	6	0.0278355	18.25	38.9804	FALSE
7	0.0345594	17.3	35.2625		7.8	0.0372315	21.75	44.2907	FALSE	6	0.0278355	18.35	39.194	FALSE
7	0.0345594	17.35	35.3644		7.8	0.0372315	21.85	44.4943	FALSE	6	0.0278355	18.4	39.3007	FALSE
7	0.0345594	17.45	35.5682		7.9	0.0377088	21.9	44.5962	FALSE	6	0.0278355	18.5	39.5143	FALSE
7.1	0.0350531	17.45	35.5682		7.9	0.0377088	22	44.7998	FALSE	6	0.0278355	18.55	39.6211	FALSE
7.1	0.0350531	17.5	35.6701		8	0.0381862	22	44.7998	FALSE	6	0.0278355	18.65	39.8347	FALSE
7.1	0.0350531	17.55	35.772		8	0.0381862	22.05	44.9016	FALSE	6	0.0278355	18.7	39.9415	FALSE
7.2	0.0355468	17.7	36.0778		8	0.0381862	22.1	45.0034	FALSE	6	0.0278355	18.75	40.0483	FALSE
7.3	0.0360405	17.8	36.2816		8	0.0381862	22.2	45.2071	FALSE	6	0.0278355	18.85	40.2619	FALSE
7.3	0.0360405	17.85	36.3835		8	0.0381862	22.25	45.3089	FALSE	6	0.0278355	18.9	40.3687	FALSE
7.4	0.0365342	17.85	36.3835		8	0.0381862	22.35	45.5125	FALSE	6	0.0278355	19	40.5823	FALSE
7.4	0.0365342	17.95	36.5873		8.1	0.0386635	22.35	45.5125	FALSE	6	0.0278355	19.05	40.6891	FALSE
7.4	0.0365342	18	36.6893		8.1	0.0386635	22.5	45.818	FALSE	6	0.0278355	19.15	40.9027	FALSE
7.4	0.0365342	18.1	36.8931		8.1	0.0386635	22.55	45.9198	FALSE	6	0.0278355	19.2	41.0095	FALSE
7.4	0.0365342	18.15	36.995		8.1	0.0386635	22.65	46.1234	FALSE	6	0.0278355	19.25	41.1163	FALSE
7.4	0.0365342	18.2	37.0969		8.1	0.0386635	22.7	46.2253	FALSE	6	0.0278355	19.35	41.3299	FALSE
7.4	0.0365342	18.3	37.3007		8.2	0.0391408	22.7	46.2253	FALSE	6	0.0278355	19.4	41.4367	FALSE
7.4	0.0365342	18.35	37.4027		8.2	0.0391408	22.75	46.3271	FALSE	6	0.0278355	19.5	41.6502	FALSE
7.4	0.0365342	18.45	37.6065		8.2	0.0391408	22.85	46.5307	FALSE	6	0.0278355	19.55	41.757	FALSE
7.4	0.0365342	18.5	37.7084		8.2	0.0391408	22.9	46.6325	FALSE	6	0.0278355	19.65	41.9706	FALSE
7.4	0.0365342	18.6	37.9122		8.2	0.0391408	23	46.8362	FALSE	6	0.0278355	19.7	42.0774	FALSE
7.4	0.0365342	18.65	38.0141		8.3	0.0396181	23	46.8362	FALSE	6	0.0278355	19.8	42.291	FALSE
7.8	0.038509	18.65	38.0141		8.3	0.0396181	23.05	46.938	FALSE	6	0.0278355	19.85	42.3978	FALSE
7.8	0.038509	18.7	38.1161		8.4	0.0400955	23.05	46.938	FALSE	6	0.0278355	19.9	42.5046	FALSE
7.8	0.038509	18.8	38.3199		8.4	0.0400955	23.15	47.1416	FALSE	6	0.0278355	20	42.7182	FALSE
7.8	0.038509	18.85	38.4218		8.4	0.0400955	23.2	47.2434	FALSE	6	0.0278355	20.05	42.825	FALSE
7.8	0.038509	18.95	38.6256		8.4	0.0400955	23.25	47.3452	FALSE	6.3	0.0292273	20.05	42.825	FALSE
7.8	0.038509	19	38.7276		8.4	0.0400955	23.35	47.5489	FALSE	6.4	0.0296912	20.05	42.825	FALSE
7.8	0.038509	19.1	38.9314		8.4	0.0400955	23.4	47.6507	FALSE	6.4	0.0296912	20.15	43.0386	FALSE
7.8	0.038509	19.15	39.0333		8.4	0.0400955	23.5	47.8543	FALSE	6.4	0.0296912	20.2	43.1454	FALSE
7.8	0.038509	19.25	39.2371		8.4	0.0400955	23.55	47.9562	FALSE	6.4	0.0296912	20.3	43.359	FALSE
7.8	0.038509	19.3	39.339		8.4	0.0400955	23.65	48.1598	FALSE	6.4	0.0296912	20.35	43.4658	FALSE
7.8	0.038509	19.35	39.441		8.4	0.0400955	23.7	48.2616	FALSE	6.4	0.0296912	20.4	43.5726	FALSE
7.8	0.038509	19.45	39.6448		8.4	0.0400955	23.75	48.3634	FALSE	6.4	0.0296912	20.5	43.7862	FALSE
7.8	0.038509	19.5	39.7467		8.4	0.0400955	23.9	48.6689	FALSE	6.4	0.0296912	20.55	43.893	FALSE
7.8	0.038509	19.6	39.9505		8.4	0.0400955	24	48.8725	FALSE	6.4	0.0296912	20.65	44.1065	FALSE
7.8	0.038509	19.65	40.0524		8.4	0.0400955	24.05	48.9743	FALSE	6.4	0.0296912	20.7	44.2133	FALSE
8.2	0.0404838	19.65	40.0524		8.4	0.0400955	24.15	49.178	FALSE	6.4	0.0296912	20.8	44.4269	FALSE
8.2	0.0404838	19.75	40.2563		8.4	0.0400955	24.2	49.2798	FALSE	6.4	0.0296912	20.85	44.5337	FALSE
8.2	0.0404838	19.8	40.3582		8.4	0.0400955	24.3	49.4834	FALSE	6.4	0.0296912	20.9	44.6405	FALSE
8.2	0.0404838	19.85	40.4601		8.6	0.0410501	24.35	49.5852	FALSE	6.4	0.0296912	21	44.8541	FALSE
8.2	0.0404838	19.95	40.6639		8.6	0.0410501	24.5	49.8907	FALSE	6.4	0.0296912	21.05	44.9609	FALSE
8.2	0.0404838	20	40.7658		8.6	0.0410501	24.65	50.1961	FALSE	6.4	0.0296912	21.15	45.1745	FALSE
8.2	0.0404838	20.15	41.0716		8.6	0.0410501	24.7	50.298	FALSE	6.4	0.0296912	21.2	45.2813	FALSE
8.2	0.0404838	20.25	41.2754		8.7	0.0415274	24.7	50.298	FALSE	6.4	0.0296912	21.2	45.2813	FALSE
8.2	0.0404838	20.3	41.3773		8.7	0.0415274	24.8	50.5016	FALSE	6.4	0.0296912	21.3	45.4949	FALSE
8.2	0.0404838	20.3	41.3773		8.7	0.0415274	24.85	50.6034	FALSE	6.4	0.0296912	21.35	45.6017	FALSE
8.2	0.0404838	20.4	41.5812		8.7	0.0415274	24.9	50.7052	FALSE	6.4	0.0296912	21.45	45.8153	FALSE
8.3	0.0409775	20.45	41.6831		8.8	0.0420048	25	50.9089	FALSE	6.4	0.0296912	21.5	45.9221	FALSE
8.3	0.0409775	20.5	41.785		8.8	0.0420048	25.05	51.0107	FALSE	6.4	0.0296912	21.5	45.9221	FALSE
8.3	0.0409775	20.6	41.9888		8.8	0.0420048	25.15	51.2143	FALSE	6.8	0.0315469	21.5	45.9221	FALSE
8.4	0.0414712	20.8	42.3965		8.8	0.0420048	25.2	51.3161	FALSE	6.8	0.0315469	21.55	46.0289	FALSE
8.4	0.0414712	20.9	42.6003		8.8	0.0420048	25.3	51.5198	FALSE	6.8	0.0315469	21.65	46.2425	FALSE
8.5	0.0419649	21	42.8041		8.8	0.0420048	25.35	51.6216	FALSE	6.8	0.0315469	21.8	46.5628	FALSE
8.6	0.0424587	21.1	43.008		8.8	0.0420048	25.45	51.8252	FALSE	6.8	0.0315469	21.85	46.6696	FALSE
8.6	0.0424587	21.25	43.3137		8.8	0.0420048	25.5	51.927	FALSE	6.8	0.0315469	21.95	46.8832	FALSE
8.6	0.0424587	21.3	43.4156		8.8	0.0420048	25.55	52.0289	FALSE	6.8	0.0315469	22	46.99	FALSE
8.6	0.0424587	21.45	43.7214		9.2	0.0439141	25.65	52.2325	FALSE	6.8	0.0315469	22.05	47.0968	FALSE
8.6	0.0424587	21.5	43.8233		9.2	0.0439141	25.7	52.3343	FALSE	6.8	0.0315469	22.15	47.3104	FALSE
8.6	0.0424587	21.6	44.0271		9.2	0.0439141	25.85	52.6398	FALSE	6.8	0.0315469	22.2	47.4172	FALSE
8.8	0.0434461	21.65	44.129		9.2	0.0439141	25.95	52.8434	FALSE	6.9	0.0320108	22.2	47.4172	FALSE
8.9	0.0439398	21.95	44.7405		9.2	0.0439141	26	52.9452	FALSE	6.9	0.0320108	22.35	47.7376	FALSE
8.9	0.0439398	22.05	44.9443		9.2	0.0439141	26.05	53.047	FALSE	6.9	0.0320108	22.45	47.9512	FALSE
9	0.0444335	22.1	45.0463		9.2	0.0439141	26.15	53.2507	FALSE	6.9	0.0320108	22.5	48.058	FALSE
9	0.0444335	22.15	45.1482		9.2	0.0439141	26.2	53.3525	FALSE	6.9	0.0320108	22.5	48.058	FALSE
9	0.0444335	22.25	45.352		9.2	0.0439141	26.3	53.5561	FALSE	7.2	0.0334026	22.5	48.058	FALSE
9	0.0444335	22.3	45.4539		9.2	0.0439141	26.35	53.6579	FALSE	7.2	0.0334026	22.6	48.2716	FALSE
9	0.0444335	22.4	45.6577		9.2	0.0439141	26.45	53.8616	FALSE	7.2	0.0334026	22.65	48.3784	FALSE
9	0.0444335	22.4	45.6577		9.2	0.0439141	26.5	53.9634	FALSE	7.2	0.0334026	22.8	48.6988	FALSE
9	0.0444335	22.45	45.7597		9.2	0.0439141	26.6	54.167	FALSE	7.2	0.0334026	22.85	48.8055	FALSE
9.1	0.0449272	22.55	45.9635		9.2	0.0439141	26.65	54.2689	FALSE	7.2	0.0334026	22.85	48.8055	FALSE
9.1	0.0449272	22.65	46.1673		9.4	0.0448687	26.65	54.2689	FALSE	7.6	0.0352583	22.85	48.8055	FALSE
9.2	0.0454209	22.8	46.4731		9.5	0.0453461	26.7	54.3707	FALSE	7.6	0.0352583	22.95	49.0191	FALSE
9.4	0.0464083	22.8	46.4731		9.5	0.0453461	26.8	54.5743	FALSE	7.6	0.0352583	23	49.1259	FALSE
9.4	0.0464083	22.95	46.7788		9.5	0.0453461	26.85	54.6761	FALSE	7.6	0.0352583	23.1	49.3395	FALSE
9.4	0.0464083	23.1	47.0845		9.5	0.0453461	26.95	54.8798	FALSE	7.6	0.0352583	23.15	49.4463	FALSE
9.4	0.0464083	23.2	47.2884		9.5	0.0453461	27	54.9816	FALSE	7.6	0.0352583	23.2	49.5531	FALSE
9.4	0.0464083	23.25	47.3903		9.5	0.0453461	27.1	55.1852	FALSE	7.6	0.0352583	23.3	49.7667	FALSE
9.4	0.0464083	23.3	47.4922		9.6	0.0458234	27.1	55.1852	FALSE	7.6	0.0352583	23.35	49.8735	FALSE
9.4	0.0464083	23.45	47.798		9.6	0.0458234	27.15	55.287	FALSE	7.6	0.0352583	23.35	49.8735	FALSE
9.4	0.0464083	23.55	48.0018		9.6	0.0458234	27.2	55.3888	FALSE	7.6	0.0352583	23.45	50.0871	FALSE
9.4	0.0464083	23.6	48.1037		9.6	0.0458234	27.3	55.5925	FALSE	7.6	0.0352583	23.5	50.1939	FALSE
9.7	0.0478894	23.9	48.7152		9.6	0.0458234	27.35	55.6943	FALSE	7.6	0.0352583	23.65	50.5143	FALSE
9.7	0.0478894	23.95	48.8171		9.6	0.0458234	27.45	55.8979	FALSE	7.6	0.0352583	23.65	50.5143	FALSE
9.8	0.0483831	24.05	49.0209		9.6	0.0458234	27.5	55.9998	FALSE	7.9	0.0366501	23.65	50.5143	FALSE
9.8	0.0483831	24.1	49.1228		9.6	0.0458234	27.6	56.2034	FALSE	7.9	0.0366501	23.8	50.8347	FALSE
9.8	0.0483831	24.2	49.3267		9.6	0.0458234	27.65	56.3052	FALSE	7.9	0.0366501	23.85	50.9415	FALSE
9.8	0.0483831	24.35	49.6324		9.9	0.0472554	27.65	56.3052	FALSE	7.9	0.0366501	23.95	51.155	FALSE
9.8	0.0483831	24.35	49.6324		9.9	0.0472554	27.7	56.407	FALSE	7.9	0.0366501	24	51.2618	FALSE
9.8	0.0483831	24.35	49.6324		9.9	0.0472554	27.85	56.7125	FALSE	8	0.037114	24	51.2618	FALSE
9.8	0.0483831	24.4	49.7343		9.9	0.0472554	27.95	56.9161	FALSE	8	0.037114	24.1	51.4754	FALSE
9.8	0.0483831	24.55	50.0401		9.9	0.0472554	28	57.0179	FALSE	8	0.037114	24.1	51.4754	FALSE
9.8	0.0483831	24.55	50.0401		9.9	0.0472554	28.1	57.2216	FALSE	8	0.037114	24.15	51.5822	FALSE
9.8	0.0483831	24.7	50.3458		10	0.0477327	28.1	57.2216	FALSE	8	0.037114	24.25	51.7958	FALSE
9.8	0.0483831	24.7	50.3458		10	0.0477327	28.15	57.3234	FALSE	8	0.037114	24.25	51.7958	FALSE
9.8	0.0483831	24.85	50.6516		10	0.0477327	28.25	57.527	FALSE	8	0.037114	24.3	51.9026	FALSE
10	0.0493705	24.95	50.8554		10	0.0477327	28.3	57.6288	FALSE	8	0.037114	24.35	52.0094	FALSE
10.1	0.0498642	25.1	51.1611		10	0.0477327	28.45	57.9343	FALSE	8	0.037114	24.45	52.223	FALSE
10.2	0.0503579	25.1	51.1611		10	0.0477327	28.5	58.0361	FALSE	8	0.037114	24.45	52.223	FALSE
10.2	0.0503579	25.2	51.365		10	0.0477327	28.6	58.2397	FALSE	8	0.037114	24.5	52.3298	FALSE
10.2	0.0503579	25.25	51.4669		10	0.0477327	28.65	58.3416	FALSE	8	0.037114	24.6	52.5434	FALSE
10.2	0.0503579	25.35	51.6707		10	0.0477327	28.75	58.5452	FALSE	8	0.037114	24.65	52.6502	FALSE
10.2	0.0503579	25.4	51.7726		10	0.0477327	28.8	58.647	FALSE	8	0.037114	24.65	52.6502	FALSE
10.2	0.0503579	25.45	51.8745		10	0.0477327	28.85	58.7488	FALSE	8	0.037114	24.75	52.8638	FALSE
10.2	0.0503579	25.55	52.0784		10	0.0477327	28.95	58.9525	FALSE	8	0.037114	24.8	52.9706	FALSE
10.4	0.0513453	25.55	52.0784		10	0.0477327	29	59.0543	FALSE	8	0.037114	24.85	53.0774	FALSE
10.4	0.0513453	25.6	52.1803		10	0.0477327	29.1	59.2579	FALSE	8	0.037114	24.85	53.0774	FALSE
10.5	0.0518391	25.9	52.7918		10	0.0477327	29.15	59.3597	FALSE	8	0.037114	24.95	53.291	FALSE
10.5	0.0518391	26	52.9956		10	0.0477327	29.25	59.5634	FALSE	8	0.037114	25	53.3978	FALSE
10.6	0.0523328	26	52.9956		10	0.0477327	29.3	59.6652	FALSE	8	0.037114	25.1	53.6113	FALSE
10.6	0.0523328	26.05	53.0975		10	0.0477327	29.4	59.8688	FALSE	8	0.037114	25.1	53.6113	FALSE
10.6	0.0523328	26.1	53.1994		10.4	0.049642	29.4	59.8688	FALSE	8	0.037114	25.15	53.7181	FALSE
10.6	0.0523328	26.2	53.4033		10.4	0.049642	29.45	59.9706	FALSE	8	0.037114	25.25	53.9317	FALSE
10.6	0.0523328	26.25	53.5052		10.4	0.049642	29.5	60.0725	FALSE	8.2	0.0380419	25.3	54.0385	FALSE
10.6	0.0523328	26.35	53.709		10.4	0.049642	29.6	60.2761	FALSE	8.3	0.0385058	25.4	54.2521	FALSE
10.6	0.0523328	26.4	53.8109		10.4	0.049642	29.65	60.3779	FALSE	8.3	0.0385058	25.45	54.3589	FALSE
10.6	0.0523328	26.5	54.0147		10.4	0.049642	29.75	60.5816	FALSE	8.3	0.0385058	25.45	54.3589	FALSE
10.6	0.0523328	26.6	54.2186		10.4	0.049642	29.8	60.6834	FALSE	8.4	0.0389697	25.45	54.3589	FALSE
10.7	0.0528265	26.7	54.4224		10.4	0.049642	29.9	60.887	FALSE	8.4	0.0389697	25.5	54.4657	FALSE
10.8	0.0533202	26.7	54.4224		10.4	0.049642	29.95	60.9888	FALSE	8.4	0.0389697	25.5	54.4657	FALSE
10.8	0.0533202	26.75	54.5243		10.4	0.049642	30	61.0906	FALSE	8.4	0.0389697	25.6	54.6793	FALSE
10.9	0.0538139	26.9	54.8301		10.4	0.049642	30.1	61.2943	FALSE	8.4	0.0389697	25.6	54.6793	FALSE
10.9	0.0538139	27	55.0339		10.4	0.049642	30.15	61.3961	FALSE	8.4	0.0389697	25.65	54.7861	FALSE
11	0.0543076	27	55.0339		10.4	0.049642	30.25	61.5997	FALSE	8.4	0.0389697	25.75	54.9997	FALSE
11	0.0543076	27.05	55.1358		10.4	0.049642	30.3	61.7015	FALSE	8.4	0.0389697	25.75	54.9997	FALSE
11	0.0543076	27.15	55.3396		10.4	0.049642	30.45	62.007	FALSE	8.4	0.0389697	25.8	55.1065	FALSE
11	0.0543076	27.2	55.4415		10.4	0.049642	30.55	62.2106	FALSE	8.4	0.0389697	25.9	55.3201	FALSE
11	0.0543076	27.25	55.5435		10.8	0.0515513	30.55	62.2106	FALSE	8.4	0.0389697	25.9	55.3201	FALSE
11	0.0543076	27.35	55.7473		10.8	0.0515513	30.6	62.3125	FALSE	8.4	0.0389697	25.95	55.4269	FALSE
11	0.0543076	27.4	55.8492		10.8	0.0515513	30.65	62.4143	FALSE	8.4	0.0389697	26	55.5337	FALSE
11	0.0543076	27.55	56.1549		10.8	0.0515513	30.75	62.6179	FALSE	8.4	0.0389697	26	55.5337	FALSE
11	0.0543076	27.65	56.3588		10.8	0.0515513	30.8	62.7197	FALSE	8.4	0.0389697	26.1	55.7473	FALSE
11.2	0.055295	27.7	56.4607		10.8	0.0515513	30.9	62.9234	FALSE	8.4	0.0389697	26.15	55.854	FALSE
11.2	0.055295	27.75	56.5626		10.8	0.0515513	30.95	63.0252	FALSE	8.4	0.0389697	26.15	55.854	FALSE
11.3	0.0557887	28	57.0722		10.8	0.0515513	31.05	63.2288	FALSE	8.4	0.0389697	26.25	56.0676	FALSE
11.3	0.0557887	28.15	57.3779		10.8	0.0515513	31.1	63.3306	FALSE	8.4	0.0389697	26.25	56.0676	FALSE
11.4	0.0562824	28.15	57.3779		10.8	0.0515513	31.15	63.4324	FALSE	8.4	0.0389697	26.3	56.1744	FALSE
11.4	0.0562824	28.2	57.4798		10.8	0.0515513	31.25	63.6361	FALSE	8.4	0.0389697	26.4	56.388	FALSE
11.4	0.0562824	28.3	57.6837		10.8	0.0515513	31.3	63.7379	FALSE	8.4	0.0389697	26.4	56.388	FALSE
11.4	0.0562824	28.35	57.7856		10.8	0.0515513	31.4	63.9415	FALSE	8.5	0.0394336	26.4	56.388	FALSE
11.4	0.0562824	28.4	57.8875		10.8	0.0515513	31.45	64.0434	FALSE	8.5	0.0394336	26.45	56.4948	FALSE
11.4	0.0562824	28.5	58.0913		11.2	0.0534606	31.45	64.0434	FALSE	8.5	0.0394336	26.55	56.7084	FALSE
11.4	0.0562824	28.55	58.1932		11.2	0.0534606	31.55	64.247	FALSE	8.7	0.0403615	26.55	56.7084	FALSE
11.4	0.0562824	28.65	58.3971		11.2	0.0534606	31.6	64.3488	FALSE	8.8	0.0408254	26.6	56.8152	FALSE
11.4	0.0562824	28.7	58.499		11.2	0.0534606	31.7	64.5524	FALSE	8.8	0.0408254	26.6	56.8152	FALSE
11.4	0.0562824	28.8	58.7028		11.2	0.0534606	31.75	64.6543	FALSE	8.8	0.0408254	26.65	56.922	FALSE
11.4	0.0562824	28.85	58.8047		11.2	0.0534606	31.8	64.7561	FALSE	8.8	0.0408254	26.65	56.922	FALSE
11.4	0.0562824	28.9	58.9066		11.2	0.0534606	31.9	64.9597	FALSE	8.8	0.0408254	26.75	57.1356	FALSE
11.4	0.0562824	29.05	59.2124		11.2	0.0534606	31.95	65.0615	FALSE	8.8	0.0408254	26.75	57.1356	FALSE
11.4	0.0562824	29.15	59.4162		11.2	0.0534606	32.05	65.2652	FALSE	8.8	0.0408254	26.9	57.456	FALSE
11.4	0.0562824	29.3	59.722		11.2	0.0534606	32.1	65.367	FALSE	8.8	0.0408254	26.9	57.456	FALSE
11.4	0.0562824	29.35	59.8239		11.2	0.0534606	32.2	65.5706	FALSE	8.8	0.0408254	26.95	57.5628	FALSE
11.4	0.0562824	29.5	60.1296		11.2	0.0534606	32.25	65.6724	FALSE	8.8	0.0408254	26.95	57.5628	FALSE
11.5	0.0567761	29.55	60.2315		11.2	0.0534606	32.3	65.7743	FALSE	8.8	0.0408254	27.05	57.7764	FALSE
11.6	0.0572698	29.55	60.2315		11.2	0.0534606	32.4	65.9779	FALSE	8.9	0.0412893	27.1	57.8832	FALSE
11.7	0.0577635	29.7	60.5373		11.2	0.0534606	32.45	66.0797	FALSE	8.9	0.0412893	27.15	57.99	FALSE
11.7	0.0577635	29.85	60.843		11.4	0.0544153	32.45	66.0797	FALSE	8.9	0.0412893	27.15	57.99	FALSE
11.8	0.0582572	29.95	61.0469		11.6	0.0553699	32.45	66.0797	FALSE	8.9	0.0412893	27.25	58.2036	FALSE
11.8	0.0582572	30	61.1488		11.6	0.0553699	32.55	66.2833	FALSE	8.9	0.0412893	27.3	58.3103	FALSE
11.8	0.0582572	30.05	61.2507		11.6	0.0553699	32.6	66.3852	FALSE	9	0.0417533	27.3	58.3103	FALSE
11.9	0.0587509	30.15	61.4545		11.6	0.0553699	32.7	66.5888	FALSE	9	0.0417533	27.4	58.5239	FALSE
11.9	0.0587509	30.2	61.5564		11.6	0.0553699	32.75	66.6906	FALSE	9	0.0417533	27.45	58.6307	FALSE
12	0.0592446	30.35	61.8622		11.6	0.0553699	32.8	66.7924	FALSE	9	0.0417533	27.55	58.8443	FALSE
12	0.0592446	30.5	62.1679		11.6	0.0553699	32.9	66.9961	FALSE	9	0.0417533	27.6	58.9511	FALSE
12.1	0.0597383	30.7	62.5756		11.6	0.0553699	32.95	67.0979	FALSE	9.1	0.0422172	27.6	58.9511	FALSE
12.2	0.060232	30.8	62.7794		11.6	0.0553699	33.05	67.3015	FALSE	9.1	0.0422172	27.7	59.1647	FALSE
12.2	0.060232	30.85	62.8813		11.6	0.0553699	33.1	67.4033	FALSE	9.1	0.0422172	27.75	59.2715	FALSE
12.2	0.060232	30.95	63.0851		11.6	0.0553699	33.2	67.607	FALSE	9.1	0.0422172	27.8	59.3783	FALSE
12.2	0.060232	31.1	63.3909		11.6	0.0553699	33.25	67.7088	FALSE	9.2	0.0426811	27.8	59.3783	FALSE
12.2	0.060232	31.15	63.4928		11.6	0.0553699	33.35	67.9124	FALSE	9.2	0.0426811	27.8	59.3783	FALSE
12.2	0.060232	31.2	63.5947		12	0.0572792	33.35	67.9124	FALSE	9.2	0.0426811	27.9	59.5919	FALSE
12.2	0.060232	31.3	63.7985		12	0.0572792	33.4	68.0142	FALSE	9.2	0.0426811	27.95	59.6987	FALSE
12.2	0.060232	31.35	63.9005		12	0.0572792	33.45	68.1161	FALSE	9.2	0.0426811	28.05	59.9123	FALSE
12.2	0.060232	31.5	64.2062		12	0.0572792	33.55	68.3197	FALSE	9.2	0.0426811	28.1	60.0191	FALSE
12.4	0.0612195	31.65	64.5119		12	0.0572792	33.6	68.4215	FALSE	9.2	0.0426811	28.2	60.2327	FALSE
12.5	0.0617132	31.8	64.8177		12	0.0572792	33.7	68.6252	FALSE	9.2	0.0426811	28.25	60.3395	FALSE
12.6	0.0622069	31.85	64.9196		12	0.0572792	33.75	68.727	FALSE	9.2	0.0426811	28.3	60.4463	FALSE
12.6	0.0622069	31.95	65.1234		12	0.0572792	33.85	68.9306	FALSE	9.2	0.0426811	28.4	60.6598	FALSE
12.6	0.0622069	32	65.2253		12	0.0572792	33.9	69.0324	FALSE	9.3	0.043145	28.4	60.6598	FALSE
12.6	0.0622069	32.1	65.4292		12	0.0572792	33.95	69.1342	FALSE	9.3	0.043145	28.45	60.7666	FALSE
12.6	0.0622069	32.15	65.5311		12	0.0572792	34.05	69.3379	FALSE	9.3	0.043145	28.55	60.9802	FALSE
12.6	0.0622069	32.25	65.7349		12	0.0572792	34.1	69.4397	FALSE	9.3	0.043145	28.6	61.087	FALSE
12.6	0.0622069	32.3	65.8368		12	0.0572792	34.2	69.6433	FALSE	9.3	0.043145	28.7	61.3006	FALSE
12.6	0.0622069	32.35	65.9388		12	0.0572792	34.25	69.7451	FALSE	9.3	0.043145	28.75	61.4074	FALSE
12.6	0.0622069	32.45	66.1426		12	0.0572792	34.35	69.9488	FALSE	9.3	0.043145	28.75	61.4074	FALSE
12.6	0.0622069	32.6	66.4483		12	0.0572792	34.4	70.0506	FALSE	9.4	0.043609	28.75	61.4074	FALSE
12.6	0.0622069	32.65	66.5502		12	0.0572792	34.5	70.2542	FALSE	9.4	0.043609	28.8	61.5142	FALSE
12.6	0.0622069	32.75	66.7541		12.1	0.0577566	34.55	70.3561	FALSE	9.4	0.043609	28.9	61.7278	FALSE
12.7	0.0627006	32.8	66.856		12.1	0.0577566	34.6	70.4579	FALSE	9.4	0.043609	28.95	61.8346	FALSE
12.8	0.0631943	32.85	66.9579		12.1	0.0577566	34.7	70.6615	FALSE	9.5	0.0440729	28.95	61.8346	FALSE
13	0.0641817	33.15	67.5694		12.2	0.0582339	34.7	70.6615	FALSE	9.5	0.0440729	29.05	62.0482	FALSE
13	0.0641817	33.25	67.7732		12.2	0.0582339	34.75	70.7633	FALSE	9.5	0.0440729	29.05	62.0482	FALSE
13	0.0641817	33.3	67.8751		12.2	0.0582339	34.85	70.967	FALSE	9.6	0.0445368	29.1	62.155	FALSE
13	0.0641817	33.4	68.079		12.3	0.0587112	34.85	70.967	FALSE	9.6	0.0445368	29.1	62.155	FALSE
13	0.0641817	33.45	68.1809		12.3	0.0587112	34.9	71.0688	FALSE	9.6	0.0445368	29.2	62.3686	FALSE
13	0.0641817	33.6	68.4866		12.4	0.0591885	34.9	71.0688	FALSE	9.6	0.0445368	29.25	62.4754	FALSE
13	0.0641817	33.65	68.5885		12.4	0.0591885	35	71.2724	FALSE	9.6	0.0445368	29.35	62.689	FALSE
13	0.0641817	33.75	68.7924		12.4	0.0591885	35.05	71.3742	FALSE	9.6	0.0445368	29.4	62.7958	FALSE
13	0.0641817	33.8	68.8943		12.4	0.0591885	35.1	71.476	FALSE	9.6	0.0445368	29.4	62.7958	FALSE
13	0.0641817	33.95	69.2		12.4	0.0591885	35.2	71.6797	FALSE	9.6	0.0445368	29.45	62.9026	FALSE
13.2	0.0651691	34.1	69.5058		12.4	0.0591885	35.25	71.7815	FALSE	9.6	0.0445368	29.55	63.1161	FALSE
13.2	0.0651691	34.15	69.6077		12.5	0.0596659	35.35	71.9851	FALSE	9.6	0.0445368	29.6	63.2229	FALSE
13.3	0.0656628	34.3	69.9134		12.5	0.0596659	35.4	72.087	FALSE	9.6	0.0445368	29.7	63.4365	FALSE
13.4	0.0661565	34.45	70.2192		12.5	0.0596659	35.5	72.2906	FALSE	9.6	0.0445368	29.75	63.5433	FALSE
13.4	0.0661565	34.5	70.3211		12.6	0.0601432	35.5	72.2906	FALSE	9.6	0.0445368	29.75	63.5433	FALSE
13.4	0.0661565	34.6	70.5249		12.6	0.0601432	35.55	72.3924	FALSE	9.6	0.0445368	29.85	63.7569	FALSE
13.4	0.0661565	34.65	70.6268		12.6	0.0601432	35.65	72.596	FALSE	9.6	0.0445368	29.85	63.7569	FALSE
13.4	0.0661565	34.75	70.8307		12.6	0.0601432	35.7	72.6979	FALSE	9.6	0.0445368	29.9	63.8637	FALSE
13.4	0.0661565	34.8	70.9326		12.6	0.0601432	35.75	72.7997	FALSE	9.6	0.0445368	29.95	63.9705	FALSE
13.4	0.0661565	34.9	71.1364		12.7	0.0606205	35.75	72.7997	FALSE	9.6	0.0445368	29.95	63.9705	FALSE
13.4	0.0661565	35.05	71.4421		12.8	0.0610979	35.75	72.7997	FALSE	9.6	0.0445368	30.05	64.1841	FALSE
13.4	0.0661565	35.1	71.5441		12.8	0.0610979	35.85	73.0033	FALSE	9.6	0.0445368	30.05	64.1841	FALSE
13.4	0.0661565	35.15	71.646		12.8	0.0610979	35.9	73.1051	FALSE	9.6	0.0445368	30.1	64.2909	FALSE
13.4	0.0661565	35.25	71.8498		12.8	0.0610979	36	73.3088	FALSE	9.6	0.0445368	30.1	64.2909	FALSE
13.4	0.0661565	35.3	71.9517		12.8	0.0610979	36.15	73.6142	FALSE	9.6	0.0445368	30.2	64.5045	FALSE
13.5	0.0666502	35.4	72.1555		13.1	0.0625298	36.15	73.6142	FALSE	9.6	0.0445368	30.2	64.5045	FALSE
13.6	0.0671439	35.45	72.2575		13.1	0.0625298	36.2	73.716	FALSE	9.8	0.0454647	30.25	64.6113	FALSE
13.8	0.0681313	35.75	72.8689		13.1	0.0625298	36.35	74.0215	FALSE	9.8	0.0454647	30.55	65.2521	FALSE
13.8	0.0681313	35.8	72.9709		13.1	0.0625298	36.4	74.1233	FALSE	9.8	0.0454647	30.55	65.2521	FALSE
13.8	0.0681313	35.9	73.1747		13.2	0.0630072	36.4	74.1233	FALSE	9.8	0.0454647	30.6	65.3588	FALSE
13.8	0.0681313	35.95	73.2766		13.2	0.0630072	36.5	74.3269	FALSE	9.8	0.0454647	30.7	65.5724	FALSE
13.8	0.0681313	36.1	73.5823		13.2	0.0630072	36.55	74.4288	FALSE	9.8	0.0454647	30.75	65.6792	FALSE
13.8	0.0681313	36.2	73.7862		13.2	0.0630072	36.65	74.6324	FALSE	9.8	0.0454647	30.75	65.6792	FALSE
13.8	0.0681313	36.25	73.8881		13.2	0.0630072	36.7	74.7342	FALSE	9.8	0.0454647	30.85	65.8928	FALSE
13.8	0.0681313	36.3	73.99		13.2	0.0630072	36.75	74.836	FALSE	9.8	0.0454647	30.85	65.8928	FALSE
13.8	0.0681313	36.4	74.1938		13.2	0.0630072	36.85	75.0397	FALSE	9.8	0.0454647	30.9	65.9996	FALSE
13.8	0.0681313	36.45	74.2957		13.2	0.0630072	36.9	75.1415	FALSE	9.9	0.0459286	30.9	65.9996	FALSE
13.8	0.0681313	36.55	74.4996		13.2	0.0630072	37	75.3451	FALSE	9.9	0.0459286	30.9	65.9996	FALSE
13.9	0.068625	36.7	74.8053		13.2	0.0630072	37.05	75.4469	FALSE	10	0.0463925	31	66.2132	TRUE
14.1	0.0696124	36.8	75.0092		13.2	0.0630072	37.15	75.6506	FALSE	10	0.0463925	30.85	65.8928	FALSE
14.1	0.0696124	36.9	75.213		13.2	0.0630072	37.2	75.7524	FALSE	10	0.0463925	31	66.2132	FALSE
14.2	0.0701061	37.05	75.5187		13.2	0.0630072	37.3	75.956	FALSE	10	0.0463925	31.05	66.32	FALSE
14.2	0.0701061	37.05	75.5187		13.2	0.0630072	37.35	76.0578	FALSE	10	0.0463925	31.05	66.32	FALSE
14.2	0.0701061	37.1	75.6206		13.2	0.0630072	37.4	76.1597	FALSE	10	0.0463925	31.1	66.4268	FALSE
14.2	0.0701061	37.2	75.8245		13.2	0.0630072	37.5	76.3633	FALSE	10	0.0463925	31.2	66.6404	FALSE
14.2	0.0701061	37.25	75.9264		13.2	0.0630072	37.55	76.4651	FALSE	10	0.0463925	31.2	66.6404	FALSE
14.2	0.0701061	37.35	76.1302		13.2	0.0630072	37.65	76.6688	FALSE	10	0.0463925	31.25	66.7472	FALSE
14.2	0.0701061	37.4	76.2321		13.2	0.0630072	37.7	76.7706	FALSE	10.4	0.0482482	31.25	66.7472	FALSE
14.2	0.0701061	37.45	76.334		13.2	0.0630072	37.8	76.9742	FALSE	10.4	0.0482482	31.35	66.9608	FALSE
14.2	0.0701061	37.55	76.5379		13.2	0.0630072	37.85	77.076	FALSE	10.4	0.0482482	31.4	67.0676	FALSE
14.2	0.0701061	37.7	76.8436		13.6	0.0649165	37.85	77.076	FALSE	10.4	0.0482482	31.5	67.2812	FALSE
14.3	0.0705999	37.75	76.9455		13.6	0.0649165	37.9	77.1778	FALSE	10.4	0.0482482	31.5	67.2812	FALSE
14.4	0.0710936	37.85	77.1494		13.6	0.0649165	38	77.3815	FALSE	10.4	0.0482482	31.55	67.388	FALSE
14.5	0.0715873	37.95	77.3532		13.6	0.0649165	38.05	77.4833	FALSE	10.4	0.0482482	31.65	67.6016	FALSE
14.6	0.072081	38.1	77.6589		13.6	0.0649165	38.15	77.6869	FALSE	10.4	0.0482482	31.7	67.7084	FALSE
14.6	0.072081	38.25	77.9647		13.7	0.0653938	38.15	77.6869	FALSE	10.4	0.0482482	31.75	67.8151	FALSE
14.6	0.072081	38.35	78.1685		13.7	0.0653938	38.3	77.9924	FALSE	10.4	0.0482482	31.85	68.0287	FALSE
14.6	0.072081	38.4	78.2704		13.7	0.0653938	38.35	78.0942	FALSE	10.4	0.0482482	31.9	68.1355	FALSE
14.6	0.072081	38.45	78.3723		13.7	0.0653938	38.45	78.2978	FALSE	10.4	0.0482482	31.9	68.1355	FALSE
14.6	0.072081	38.55	78.5762		13.8	0.0658711	38.45	78.2978	FALSE	10.4	0.0482482	32	68.3491	FALSE
14.6	0.072081	38.7	78.8819		13.8	0.0658711	38.5	78.3997	FALSE	10.4	0.0482482	32.05	68.4559	FALSE
14.6	0.072081	38.75	78.9838		13.8	0.0658711	38.55	78.5015	FALSE	10.4	0.0482482	32.15	68.6695	FALSE
14.6	0.072081	38.85	79.1877		13.8	0.0658711	38.65	78.7051	FALSE	10.4	0.0482482	32.2	68.7763	FALSE
14.6	0.072081	38.9	79.2896		13.9	0.0663484	38.65	78.7051	FALSE	10.4	0.0482482	32.25	68.8831	FALSE
14.6	0.072081	39	79.4934		14	0.0668258	38.65	78.7051	FALSE	10.8	0.0501039	32.25	68.8831	FALSE
14.6	0.072081	39.1	79.6972		14	0.0668258	38.7	78.8069	FALSE	10.8	0.0501039	32.25	68.8831	FALSE
14.8	0.0730684	39.2	79.9011		14	0.0668258	38.8	79.0106	FALSE	10.8	0.0501039	32.35	69.0967	FALSE
15	0.0740558	39.25	80.003		14	0.0668258	38.85	79.1124	FALSE	10.8	0.0501039	32.35	69.0967	FALSE
15	0.0740558	39.35	80.2068		14	0.0668258	38.95	79.316	FALSE	10.8	0.0501039	32.4	69.2035	FALSE
15	0.0740558	39.4	80.3087		14	0.0668258	39	79.4178	FALSE	10.8	0.0501039	32.4	69.2035	FALSE
15	0.0740558	39.5	80.5125		14	0.0668258	39.05	79.5196	FALSE	10.8	0.0501039	32.5	69.4171	FALSE
15	0.0740558	39.55	80.6145		14.1	0.0673031	39.15	79.7233	FALSE	10.8	0.0501039	32.5	69.4171	FALSE
15.7	0.0775117	29.05	59.2124		14.1	0.0673031	39.2	79.8251	FALSE	10.8	0.0501039	32.55	69.5239	FALSE
15.8	0.0780054	27	55.0339		14.1	0.0673031	39.3	80.0287	FALSE	10.8	0.0501039	32.65	69.7375	FALSE
15.8	0.0780054	27.15	55.3396		14.2	0.0677804	39.35	80.1306	FALSE	10.8	0.0501039	32.65	69.7375	FALSE
15.8	0.0780054	27.25	55.5435		14.2	0.0677804	39.45	80.3342	FALSE	10.8	0.0501039	32.7	69.8443	FALSE
15.8	0.0780054	27.35	55.7473		14.2	0.0677804	39.5	80.436	FALSE	10.8	0.0501039	32.8	70.0579	FALSE
16	0.0789928	24.45	49.8362		14.3	0.0682578	39.5	80.436	FALSE	10.8	0.0501039	32.85	70.1646	FALSE
16.1	0.0794865	6.3	12.8412		14.4	0.0687351	39.5	80.436	FALSE	10.8	0.0501039	32.85	70.1646	FALSE
28.4	0.140212	16.15	32.9184		14.4	0.0687351	39.6	80.6396	FALSE	10.8	0.0501039	32.9	70.2714	FALSE
28.4	0.140212	16.05	32.7146		14.4	0.0687351	39.65	80.7415	FALSE	10.8	0.0501039	33	70.485	FALSE
28.4	0.140212	16.15	32.9184		14.4	0.0687351	39.7	80.8433	FALSE	10.8	0.0501039	33.05	70.5918	FALSE
28.4	0.140212	16.05	32.7146		14.4	0.0687351	39.8	81.0469	FALSE	10.8	0.0501039	33.05	70.5918	FALSE
28.4	0.140212	16.15	32.9184		14.4	0.0687351	39.85	81.1487	FALSE	10.9	0.0505678	33.05	70.5918	FALSE
28.4	0.140212	16.05	32.7146		14.4	0.0687351	39.95	81.3524	FALSE	11.2	0.0519596	33.05	70.5918	FALSE
28.4	0.140212	16.15	32.9184		14.4	0.0687351	40	81.4542	FALSE	11.2	0.0519596	33.15	70.8054	FALSE
28.4	0.140212	16.05	32.7146		14.4	0.0687351	40.1	81.6578	FALSE	11.2	0.0519596	33.15	70.8054	FALSE
28.4	0.140212	16.15	32.9184		14.4	0.0687351	40.15	81.7596	FALSE	11.2	0.0519596	33.2	70.9122	FALSE
28.4	0.140212	16.05	32.7146		14.4	0.0687351	40.2	81.8615	FALSE	11.2	0.0519596	33.3	71.1258	FALSE
28.4	0.140212	16.15	32.9184		14.5	0.0692124	40.2	81.8615	FALSE	11.2	0.0519596	33.35	71.2326	FALSE
28.4	0.140212	16.05	32.7146		14.5	0.0692124	40.3	82.0651	FALSE	11.2	0.0519596	33.4	71.3394	FALSE
28.4	0.140212	16.15	32.9184		14.5	0.0692124	40.35	82.1669	FALSE	11.2	0.0519596	33.5	71.553	FALSE
					14.6	0.0696897	40.45	82.3705	FALSE	11.2	0.0519596	33.5	71.553	FALSE
					14.6	0.0696897	40.5	82.4724	FALSE	11.2	0.0519596	33.55	71.6598	FALSE
					14.6	0.0696897	40.6	82.676	FALSE	11.2	0.0519596	33.55	71.6598	FALSE
					14.7	0.0701671	40.6	82.676	FALSE	11.2	0.0519596	33.65	71.8734	FALSE
					14.8	0.0706444	40.6	82.676	FALSE	11.2	0.0519596	33.65	71.8734	FALSE
					14.8	0.0706444	40.65	82.7778	FALSE	11.2	0.0519596	33.7	71.9802	FALSE
					14.8	0.0706444	40.75	82.9815	FALSE	11.2	0.0519596	33.8	72.1938	FALSE
					14.8	0.0706444	40.8	83.0833	FALSE	11.2	0.0519596	33.85	72.3006	FALSE
					14.8	0.0706444	40.85	83.1851	FALSE	11.2	0.0519596	33.9	72.4074	FALSE
					14.8	0.0706444	40.95	83.3887	FALSE	11.2	0.0519596	34	72.6209	FALSE
					14.8	0.0706444	41	83.4905	FALSE	11.2	0.0519596	34.05	72.7277	FALSE
					14.8	0.0706444	41.15	83.796	FALSE	11.2	0.0519596	34.05	72.7277	FALSE
					14.8	0.0706444	41.25	83.9996	FALSE	11.2	0.0519596	34.15	72.9413	FALSE
					14.8	0.0706444	41.3	84.1014	FALSE	11.3	0.0524235	34.15	72.9413	FALSE
					14.8	0.0706444	41.35	84.2033	FALSE	11.3	0.0524235	34.2	73.0481	FALSE
					15	0.071599	41.35	84.2033	FALSE	11.3	0.0524235	34.3	73.2617	FALSE
					15	0.071599	41.45	84.4069	FALSE	11.4	0.0528875	34.3	73.2617	FALSE
					15	0.071599	41.5	84.5087	FALSE	11.4	0.0528875	34.35	73.3685	FALSE
					15.1	0.0720764	41.6	84.7124	FALSE	11.6	0.0538153	34.35	73.3685	FALSE
					15.2	0.0725537	41.6	84.7124	FALSE	11.6	0.0538153	34.35	73.3685	FALSE
					15.2	0.0725537	41.65	84.8142	FALSE	11.6	0.0538153	34.45	73.5821	FALSE
					15.2	0.0725537	41.75	85.0178	FALSE	11.6	0.0538153	34.5	73.6889	FALSE
					15.2	0.0725537	41.8	85.1196	FALSE	11.6	0.0538153	34.5	73.6889	FALSE
					15.2	0.0725537	41.85	85.2214	FALSE	11.6	0.0538153	34.55	73.7957	FALSE
					15.2	0.0725537	41.95	85.4251	FALSE	11.6	0.0538153	34.65	74.0093	FALSE
					15.2	0.0725537	42	85.5269	FALSE	11.6	0.0538153	34.7	74.1161	FALSE
					15.2	0.0725537	42.1	85.7305	FALSE	11.6	0.0538153	34.8	74.3297	FALSE
					15.2	0.0725537	42.15	85.8323	FALSE	11.7	0.0542792	34.8	74.3297	FALSE
					15.2	0.0725537	42.25	86.036	FALSE	11.7	0.0542792	34.85	74.4365	FALSE
					15.2	0.0725537	42.3	86.1378	FALSE	11.8	0.0547432	34.95	74.6501	FALSE
					15.2	0.0725537	42.4	86.3414	FALSE	11.8	0.0547432	35	74.7569	FALSE
					15.2	0.0725537	42.45	86.4433	FALSE	11.8	0.0547432	35.05	74.8636	FALSE
					15.2	0.0725537	42.5	86.5451	FALSE	11.8	0.0547432	35.05	74.8636	FALSE
					15.2	0.0725537	42.6	86.7487	FALSE	11.8	0.0547432	35.15	75.0772	FALSE
					15.2	0.0725537	42.65	86.8505	FALSE	11.9	0.0552071	35.15	75.0772	FALSE
					15.6	0.074463	42.65	86.8505	FALSE	11.9	0.0552071	35.2	75.184	FALSE
					15.6	0.074463	42.75	87.0542	FALSE	12	0.055671	35.2	75.184	FALSE
					15.6	0.074463	42.8	87.156	FALSE	12	0.055671	35.3	75.3976	FALSE
					15.6	0.074463	42.9	87.3596	FALSE	12	0.055671	35.35	75.5044	FALSE
					15.6	0.074463	42.95	87.4614	FALSE	12	0.055671	35.45	75.718	FALSE
					15.6	0.074463	43	87.5632	FALSE	12	0.055671	35.45	75.718	FALSE
					15.6	0.074463	43.1	87.7669	FALSE	12.3	0.0570628	35.5	75.8248	FALSE
					15.6	0.074463	43.15	87.8687	FALSE	12.3	0.0570628	35.6	76.0384	FALSE
					15.6	0.074463	43.25	88.0723	FALSE	12.3	0.0570628	35.65	76.1452	FALSE
					15.6	0.074463	43.3	88.1742	FALSE	12.3	0.0570628	35.65	76.1452	FALSE
					15.6	0.074463	43.4	88.3778	FALSE	12.3	0.0570628	35.7	76.252	FALSE
					15.6	0.074463	43.45	88.4796	FALSE	12.4	0.0575267	35.7	76.252	FALSE
					15.6	0.074463	43.55	88.6832	FALSE	12.4	0.0575267	35.7	76.252	FALSE
					15.7	0.0749403	43.55	88.6832	FALSE	12.4	0.0575267	35.8	76.4656	FALSE
					15.7	0.0749403	43.6	88.7851	FALSE	12.4	0.0575267	35.85	76.5724	FALSE
					15.8	0.0754177	43.65	88.8869	FALSE	12.4	0.0575267	35.85	76.5724	FALSE
					15.8	0.0754177	43.75	89.0905	FALSE	12.4	0.0575267	35.95	76.786	FALSE
					15.8	0.0754177	43.8	89.1923	FALSE	12.4	0.0575267	36	76.8928	FALSE
					15.9	0.075895	43.9	89.396	FALSE	12.4	0.0575267	36.1	77.1064	FALSE
					16	0.0763723	43.9	89.396	FALSE	12.4	0.0575267	36.15	77.2131	FALSE
					16	0.0763723	43.95	89.4978	FALSE	12.4	0.0575267	36.2	77.3199	FALSE
					16	0.0763723	44.05	89.7014	FALSE	12.4	0.0575267	36.3	77.5335	FALSE
					16	0.0763723	44.1	89.8032	FALSE	12.6	0.0584546	36.3	77.5335	FALSE
					16	0.0763723	44.25	90.1087	FALSE	12.7	0.0589185	36.35	77.6403	FALSE
					16	0.0763723	44.3	90.2105	FALSE	12.7	0.0589185	36.45	77.8539	FALSE
					16	0.0763723	44.4	90.4141	FALSE	12.7	0.0589185	36.5	77.9607	FALSE
					16.1	0.0768496	44.45	90.516	FALSE	12.7	0.0589185	36.5	77.9607	FALSE
					16.1	0.0768496	44.55	90.7196	FALSE	12.8	0.0593824	36.5	77.9607	FALSE
					16.1	0.0768496	44.6	90.8214	FALSE	12.8	0.0593824	36.5	77.9607	FALSE
					16.2	0.077327	44.6	90.8214	FALSE	12.8	0.0593824	36.6	78.1743	FALSE
					16.2	0.077327	44.75	91.1269	FALSE	12.8	0.0593824	36.6	78.1743	FALSE
					16.3	0.0778043	44.8	91.2287	FALSE	12.8	0.0593824	36.65	78.2811	FALSE
					16.4	0.0782816	44.8	91.2287	FALSE	12.8	0.0593824	36.65	78.2811	FALSE
					16.4	0.0782816	44.9	91.4323	FALSE	12.8	0.0593824	36.75	78.4947	FALSE
					16.4	0.0782816	44.95	91.5341	FALSE	12.8	0.0593824	36.75	78.4947	FALSE
					16.4	0.0782816	45.05	91.7378	FALSE	12.8	0.0593824	36.8	78.6015	FALSE
					16.4	0.0782816	45.1	91.8396	FALSE	12.8	0.0593824	36.8	78.6015	FALSE
					16.4	0.0782816	45.2	92.0432	FALSE	12.8	0.0593824	36.85	78.7083	FALSE
					16.4	0.0782816	45.25	92.145	FALSE	13.2	0.0612381	36.85	78.7083	FALSE
					16.4	0.0782816	45.3	92.2469	FALSE	13.2	0.0612381	36.95	78.9219	FALSE
					16.4	0.0782816	45.4	92.4505	FALSE	13.3	0.061702	37	79.0287	FALSE
					16.4	0.0782816	45.45	92.5523	FALSE	13.6	0.0630938	37	79.0287	FALSE
					16.5	0.0787589	45.45	92.5523	FALSE	13.6	0.0630938	37	79.0287	FALSE
					16.6	0.0792363	45.6	92.8578	FALSE	13.6	0.0630938	37.1	79.2423	FALSE
					16.6	0.0792363	45.7	93.0614	FALSE	13.6	0.0630938	37.15	79.3491	FALSE
					16.7	0.0797136	45.75	93.1632	FALSE	13.6	0.0630938	37.15	79.3491	FALSE
					16.8	0.0801909	45.75	93.1632	FALSE	13.6	0.0630938	37.25	79.5627	FALSE
					16.8	0.0801909	45.8	93.265	FALSE	13.6	0.0630938	37.25	79.5627	FALSE
					16.8	0.0801909	45.9	93.4687	FALSE	13.6	0.0630938	37.3	79.6694	FALSE
					16.8	0.0801909	45.95	93.5705	FALSE	13.6	0.0630938	37.35	79.7762	FALSE
					16.8	0.0801909	46.05	93.7741	FALSE	13.6	0.0630938	37.35	79.7762	FALSE
					16.8	0.0801909	46.1	93.8759	FALSE	13.6	0.0630938	37.45	79.9898	FALSE
					16.8	0.0801909	46.2	94.0796	FALSE	13.6	0.0630938	37.5	80.0966	FALSE
					16.8	0.0801909	46.25	94.1814	FALSE	13.6	0.0630938	37.5	80.0966	FALSE
					16.8	0.0801909	46.35	94.385	FALSE	13.6	0.0630938	37.6	80.3102	FALSE
					16.9	0.0806683	46.35	94.385	FALSE	13.6	0.0630938	37.65	80.417	FALSE
					16.9	0.0806683	46.4	94.4869	FALSE	13.6	0.0630938	37.75	80.6306	FALSE
					16.9	0.0806683	46.45	94.5887	FALSE	13.6	0.0630938	37.75	80.6306	FALSE
					16.9	0.0806683	46.55	94.7923	FALSE	13.6	0.0630938	37.8	80.7374	FALSE
					17	0.0811456	46.55	94.7923	FALSE	13.6	0.0630938	37.85	80.8442	FALSE
					17	0.0811456	46.6	94.8941	FALSE	13.6	0.0630938	37.95	81.0578	FALSE
					17	0.0811456	46.7	95.0978	FALSE	13.6	0.0630938	38	81.1646	FALSE
					17	0.0811456	46.75	95.1996	FALSE	13.7	0.0635577	38	81.1646	FALSE
					17.1	0.0816229	46.85	95.4032	FALSE	13.7	0.0635577	38.1	81.3782	FALSE
					17.2	0.0821002	46.85	95.4032	FALSE	13.7	0.0635577	38.15	81.485	FALSE
					17.2	0.0821002	46.9	95.505	FALSE	13.8	0.0640217	38.15	81.485	FALSE
					17.2	0.0821002	46.95	95.6068	FALSE	13.9	0.0644856	38.25	81.6986	FALSE
					17.2	0.0821002	47.05	95.8105	FALSE	14	0.0649495	38.3	81.8054	FALSE
					17.2	0.0821002	47.1	95.9123	FALSE	14	0.0649495	38.3	81.8054	FALSE
					17.3	0.0825776	47.2	96.1159	FALSE	14	0.0649495	38.4	82.0189	FALSE
					17.6	0.0840095	42	85.5269	TRUE	14	0.0649495	38.4	82.0189	FALSE
					17.9	0.0854415	14.1	28.7126	TRUE	14	0.0649495	38.45	82.1257	FALSE
					28.4	0.135561	16.05	32.6835	FALSE	14	0.0649495	38.5	82.2325	FALSE
					28.4	0.135561	16.15	32.8871	FALSE	14	0.0649495	38.5	82.2325	TRUE
					28.4	0.135561	16.05	32.6835	TRUE	14	0.0649495	38.45	82.1257	TRUE
										14.1	0.0654135	38.4	82.0189	TRUE
										14.1	0.0654135	38.3	81.8054	FALSE
										14.1	0.0654135	38.4	82.0189	TRUE
										14.1	0.0654135	38.3	81.8054	TRUE
										14.3	0.0663413	37.45	79.9898	TRUE
										14.3	0.0663413	32.9	70.2714	TRUE
										14.3	0.0663413	29.9	63.8637	FALSE
										14.3	0.0663413	29.95	63.9705	TRUE
										14.8	0.0686609	24.5	52.3298	TRUE
										14.8	0.0686609	21.65	46.2425	FALSE
										14.8	0.0686609	21.7	46.3492	FALSE
										14.8	0.0686609	21.8	46.5628	FALSE
										14.8	0.0686609	21.95	46.8832	FALSE
										14.8	0.0686609	22	46.99	FALSE
										14.8	0.0686609	22.05	47.0968	TRUE
										14.8	0.0686609	21.55	46.0289	TRUE
										14.8	0.0686609	21.35	45.6017	FALSE
										14.8	0.0686609	21.45	45.8153	FALSE
										14.8	0.0686609	21.5	45.9221	FALSE
										14.8	0.0686609	21.55	46.0289	FALSE
										14.8	0.0686609	21.85	46.6696	FALSE
										14.8	0.0686609	22	46.99	FALSE
										14.8	0.0686609	22.05	47.0968	FALSE
										14.8	0.0686609	22.15	47.3104	FALSE
										14.8	0.0686609	22.2	47.4172	FALSE
										14.8	0.0686609	22.35	47.7376	TRUE
										14.8	0.0686609	22.3	47.6308	TRUE
										14.8	0.0686609	22.15	47.3104	TRUE
										14.8	0.0686609	15.9	33.961	FALSE
										28.4	0.131755	16.05	34.2814	FALSE
										28.4	0.131755	16.15	34.4949	FALSE
										28.4	0.131755	16.15	34.4949	TRUE
														FALSE
														FALSE
														FALSE
														FALSE
														FALSE
														FALSE
														FALSE
														FALSE
														FALSE
														FALSE
														FALSE
														FALSE
														FALSE
														FALSE
														FALSE
														FALSE
														FALSE
														FALSE
														FALSE
														FALSE
														FALSE
														FALSE
														FALSE
														FALSE
														FALSE
														FALSE
														FALSE
														FALSE
														FALSE
														FALSE
														FALSE
														FALSE
														FALSE
														FALSE
														FALSE
														FALSE
														FALSE
														FALSE
														FALSE
														FALSE
														FALSE
														FALSE
														FALSE
														FALSE
														FALSE
														FALSE
														FALSE
														FALSE
														FALSE
														FALSE
														FALSE
														FALSE
														FALSE
														FALSE
														FALSE
														FALSE
														FALSE

## Sheet: Summary
Average Youngs Modulus of Elasticity =	1172.87	N/mm2
Tensile Strength =	86.321	N/mm2
Bending Strength =	131.883	N/mm2
Density of Timber =	8.83562e-07	Kg/mm3
Elasticity of Timber =	10591.2	N/mm2

## Sheet: Fleure Test
	SB1				SB2				SB3
	Max Load =	7.25	kN		Max Load =	6.7	kN		Max Load =	6.5	kN	6.81667			Max Load =	7.25	6.7	6.5	kN		Description	SB1	SB2	SB3	Unit
	Deflection =	11.8	mm		Deflection =	11.3	mm		Deflection =	8.9	mm	852.083			Deflection =	11.8	11.3	8.9	mm		Max Load =	7.25	6.7	6.5	kN
	Length (L) =	400	mm		Length (L) =	400	mm		Length (L) =	400	mm				Length (L) =	400	400	400	mm		Deflection =	11.8	11.3	8.9	mm
	Width (B) =	31.42	mm		Width (B) =	31.15	mm		Width (B) =	31.32	mm				Width (B) =	31.42	31.15	31.32	mm		Length (L) =	400	400	400	mm
	Depth (D) =	31.78	mm		Depth (D) =	31.16	mm		Depth (D) =	31.48	mm				Depth (D) =	31.78	31.16	31.48	mm		Width (B) =	31.42	31.15	31.32	mm
	Bending Strength =	137.08	N/mm2		Bending Strength =	132.915	N/mm2		Bending Strength =	125.653	N/mm2				Bending Strength =	137.08	132.915	125.653	N/mm2		Depth (D) =	31.78	31.16	31.48	mm
	Mass (M) =	387.1	gm		Mass (M) =	375.6	gm		Mass (M) =	412.3	gm				Mass (M) =	387.1	375.6	412.3	gm		Bending Strength =	137.08	132.915	125.653	N/mm2
	Density =	8.61491e-07	Kg/mm3		Density =	8.59919e-07	Kg/mm3		Density =	9.29275e-07	Kg/mm3				Density =	8.61491e-07	8.59919e-07	9.29275e-07	Kg/mm3		Mass (M) =	387.1	375.6	412.3	gm
	Moment of Inertia =	84040.1	mm4		Moment of Inertia =	78536.1	mm4		Moment of Inertia =	81422.5	mm4				Moment of Inertia =	84040.1	78536.1	81422.5	mm4		Density =	8.61491e-07	8.59919e-07	9.29275e-07	Kg/mm3
	Elasticity =	9747.83	N/mm2		Elasticity =	10066.2	N/mm2		Elasticity =	11959.6	N/mm2				Elasticity =	9747.83	10066.2	11959.6	N/mm2		Moment of Inertia =	84040.1	78536.1	81422.5	mm4
	Bending Moment =	725000	N.mm																		Elasticity =	9747.83	10066.2	11959.6	N/mm2
																					Bending Moment =	725000			N.mm
	Displacement	SB1			Displacement	SB2			Displacement	SB3
	0	0.8			0	0.8			0	0.8
	0	2			0.1	2.25			0.1	2.05
	0	2.15			0.1	2.3			0.2	2.05
	0	2.1			0.1	2.4			0.3	2.15
	0	2.25			0.1	2.45			0.3	2.2
	0	2.3			0.4	2.55			0.3	2.25
	0	2.35			0.5	2.65			0.4	2.25
	0.1	2.35			0.6	2.65			0.5	2.35
	0.1	2.45			0.8	2.75			0.6	2.4
	0.2	2.35			0.9	2.8			0.6	2.5
	0.2	2.45			0.9	2.9			0.7	2.5
	0.2	2.5			0.9	2.95			0.7	2.55
	0.3	2.5			1	2.95			0.7	2.65
	0.4	2.5			1.2	3.05			0.7	2.7
	0.4	2.45			1.3	3.05			0.8	2.8
	0.4	2.6			1.3	3.2			0.9	2.8
	0.4	2.65			1.3	3.1			1	2.8
	0.5	2.65			1.3	3.25			1.1	2.85
	0.5	2.75			1.3	3.3			1.1	2.9
	0.6	2.65			1.5	3.3			1.2	3
	0.6	2.75			1.6	3.3			1.3	3
	0.7	2.75			1.7	3.4			1.4	3.05
	0.7	2.8			1.7	3.45			1.5	3.15
	0.8	2.8			1.7	3.55			1.5	3.05
	0.8	2.75			1.7	3.6			1.5	3
	0.8	2.85			1.8	3.7			1.5	3.2
	1.1	2.85			2	3.7			1.5	3.3
	1.1	2.95			2.1	3.75			1.5	3.35
	1.1	3			2.1	3.8			1.6	3.35
	1.2	2.95			2.1	3.9			1.6	3.4
	1.2	2.85			2.2	3.9			1.7	3.4
	1.2	3			2.3	3.95			1.8	3.5
	1.2	3.1			2.4	3.95			1.8	3.4
	1.2	3.15			2.5	4.05			1.9	3.4
	1.5	3.15			2.5	3.95			1.9	3.3
	1.6	3.1			2.5	4.1			1.9	3.35
	1.6	3.25			2.8	4.1			1.9	3.5
	1.6	3.15			2.8	4.2			1.9	3.55
	1.6	3.3			2.9	4.25			1.9	3.65
	1.6	3.35			2.9	4.2			1.9	3.7
	1.6	3.45			2.9	4.35			2	3.65
	1.6	3.5			3	4.35			2.3	3.65
	1.6	3.6			3.1	4.35			2.3	3.7
	1.6	3.65			3.3	4.4			2.3	3.8
	1.7	3.65			3.3	4.45			2.3	3.85
	1.7	3.75			3.3	4.55			2.3	3.95
	1.8	3.75			3.3	4.6			2.3	4
	1.9	3.8			3.7	4.7			2.7	4
	2	3.8			3.7	4.75			2.7	3.95
	2	3.75			3.7	4.85			2.7	4.05
	2	3.65			3.7	4.9			2.7	4.15
	2.2	3.8			3.8	4.9			2.7	4.2
	2.2	3.9			3.9	4.9			2.7	4.3
	2.2	3.95			3.9	4.95			2.8	4.2
	2.2	4			4.1	4.95			2.8	4.3
	2.3	4			4.1	4.9			2.9	4.35
	2.3	3.95			4.1	5.05			2.9	4.3
	2.3	3.9			4.2	5.05			3.1	4.35
	2.4	4			4.3	5.1			3.1	4.2
	2.4	3.95			4.3	5.2			3.1	4.3
	2.4	4.1			4.4	5.2			3.1	4.45
	2.4	4.15			4.4	5.1			3.1	4.5
	2.8	4.15			4.5	5.1			3.2	4.5
	2.8	4.1			4.5	5.05			3.3	4.5
	2.8	4.25			4.5	5.2			3.4	4.55
	2.8	4.3			4.6	5.25			3.5	4.55
	2.8	4.4			4.7	5.25			3.5	4.5
	2.8	4.45			4.7	5.35			3.5	4.65
	2.9	4.45			4.8	5.35			3.5	4.7
	2.9	4.5			4.8	5.25			3.6	4.7
	3	4.5			4.9	5.25			3.6	4.8
	3.1	4.5			4.9	5.2			3.7	4.8
	3.1	4.45			4.9	5.35			3.7	4.7
	3.2	4.45			5	5.35			3.8	4.8
	3.2	4.5			5	5.4			3.8	4.85
	3.2	4.6			5.1	5.4			3.9	4.8
	3.2	4.65			5.1	5.5			3.9	4.95
	3.2	4.75			5.1	5.55			3.9	4.85
	3.2	4.8			5.2	5.5			3.9	4.7
	3.6	4.8			5.2	5.55			3.9	5
	3.6	4.75			5.3	5.5			3.9	5.1
	3.6	4.9			5.3	5.4			4	5
	3.6	4.95			5.3	5.55			4	5.1
	3.6	5.05			5.4	5.5			4.1	5.15
	3.9	5.05			5.4	5.55			4.3	5.15
	4	5.05			5.5	5.55			4.3	5.1
	4	4.95			5.5	5.7			4.3	5
	4	5.1			5.5	5.6			4.4	5.15
	4	5.15			5.6	5.6			4.4	5.2
	4.1	5.15			5.6	5.55			4.5	5.2
	4.1	5.25			5.7	5.55			4.5	5.3
	4.2	5.25			5.7	5.5			4.6	5.3
	4.2	5.3			5.7	5.6			4.6	5.2
	4.3	5.3			5.8	5.7			4.7	5.3
	4.3	5.25			5.8	5.6			4.7	5.2
	4.3	5.4			5.9	5.7			4.7	5.15
	4.4	5.3			5.9	5.75			4.9	5.3
	4.4	5.25			6	5.75			4.9	5.35
	4.4	5.15			6	5.7			4.9	5.45
	4.6	5.3			6.1	5.7			5	5.45
	4.6	5.4			6.1	5.6			5.1	5.45
	4.7	5.45			6.1	5.75			5.1	5.35
	4.7	5.4			6.2	5.7			5.1	5.5
	4.7	5.55			6.2	5.6			5.3	5.45
	4.8	5.45			6.3	5.7			5.3	5.5
	4.8	5.55			6.3	5.75			5.4	5.6
	4.8	5.4			6.4	5.75			5.4	5.5
	4.8	5.6			6.5	5.75			5.5	5.6
	5.2	5.6			6.5	5.6			5.5	5.5
	5.2	5.65			6.5	5.7			5.5	5.65
	5.2	5.75			6.5	5.85			5.6	5.65
	5.2	5.8			6.6	5.75			5.6	5.7
	5.2	5.9			6.9	5.85			5.6	5.8
	5.4	5.9			6.9	5.9			5.7	5.7
	5.6	5.9			6.9	5.75			5.7	5.8
	5.6	5.8			7	5.9			5.7	5.85
	5.6	5.95			7	6			5.8	5.85
	5.7	5.95			7.1	5.9			5.9	5.85
	5.7	6.05			7.1	6.05			5.9	5.8
	5.8	6.05			7.2	6.05			5.9	5.7
	5.8	6.1			7.3	6			6	5.8
	5.9	6.05			7.3	5.9			6	5.7
	6	6.1			7.4	6			6	5.85
	6	5.9			7.5	6			6.1	5.85
	6	5.95			7.5	6.05			6.1	5.95
	6	6.05			7.6	6.05			6.1	5.8
	6.1	6.05			7.7	6			6.2	5.8
	6.1	6.1			7.7	6.05			6.2	5.7
	6.2	6.2			7.8	6.05			6.3	5.7
	6.2	6.1			7.9	6.05			6.3	5.8
	6.2	6.05			7.9	6.1			6.3	5.65
	6.3	6.2			7.9	6.2			6.3	5.6
	6.3	6.1			8	6.2			6.4	5.8
	6.4	6.1			8.1	6.1			6.5	5.8
	6.4	6.05			8.1	6.05			6.5	5.85
	6.4	6.2			8.5	6.1			6.5	5.95
	6.4	6.25			8.5	6.2			6.6	5.95
	6.5	6.25			8.6	6.2			6.6	5.85
	6.5	6.3			8.6	6.1			6.7	5.85
	6.6	6.25			8.7	6.2			6.7	5.95
	6.6	6.3			8.8	6.25			6.7	5.8
	6.8	6.3			8.9	6.35			6.7	6
	6.8	6.25			8.9	6.25			6.8	6
	6.8	6.2			8.9	6.2			6.9	6
	6.9	6.3			8.9	6.1			6.9	6.1
	6.9	6.25			9	6.25			7	5.95
	7	6.4			9.1	6.25			7	5.85
	7.1	6.4			9.1	6.35			7.1	5.85
	7.1	6.45			9.3	6.35			7.1	5.8
	7.2	6.45			9.3	6.2			7.1	5.95
	7.2	6.4			9.3	6.25			7.1	6
	7.2	6.3			9.4	6.25			7.2	5.95
	7.4	6.4			9.4	6.35			7.2	5.85
	7.6	6.4			9.5	6.35			7.2	6
	7.6	6.45			9.6	6.4			7.3	6
	7.6	6.55			9.6	6.35			7.3	6.1
	8	6.55			9.7	6.35			7.4	6.1
	8	6.45			9.7	6.25			7.4	6.15
	8	6.6			9.7	6.4			7.5	6
	8	6.7			10.1	6.35			7.5	6.1
	8.4	6.6			10.1	6.4			7.5	5.95
	8.4	6.7			10.5	6.4			7.7	6
	8.4	6.75			10.5	6.5			7.7	6.15
	8.5	6.7			10.8	6.5			7.7	6.2
	8.5	6.75			10.8	6.55			7.8	6.15
	8.6	6.75			10.9	6.55			7.8	6.2
	8.6	6.8			10.9	6.5			7.9	6.2
	8.7	6.75			11	6.55			7.9	6.15
	8.8	6.75			11.1	6.55			7.9	6.1
	8.8	6.7			11.3	6.6			8.3	6.15
	9	6.7			11.3	6.7			8.3	6.2
	9	6.75			11.3	6.55			8.3	6.3
	9	6.8			11.3	6.5			8.7	6.3
	9	6.9			11.3	6.4			8.7	6.2
	9.1	6.8			11.4	6.4			8.7	6.35
	9.1	6.75			11.5	6.4			8.9	6.35
	9.2	6.8			11.5	6.55			8.9	6.45
	9.2	6.75			11.6	6.55			8.9	6.5
	9.4	6.8			11.6	6.5			9	6.45
	9.4	6.9			11.7	6.5			9	6.43
	9.4	6.95			11.7	6.4			9.1	6.43
	9.4	7.05			11.7	6.35			9.1	6.4
	9.5	6.95			11.7	6.25			9.1	6.3
	9.5	6.9			12.1	6.35			9.1	6.25
	9.6	6.95			12.1	6.25			9.1	6.2
	9.6	6.9			12.1	6.2			9.15	6.2
	9.6	6.8			12.2	6.2			9.15	6.1
	9.7	6.9			12.2	6.25			9.2	6.1
	9.8	6.95			12.3	6.25			9.2	6.2
	10	6.95			12.3	6.35			9.3	6.1
	10	7.05			12.4	6.35			9.3	6.05
	10	6.9			12.4	6.25			9.3	6
	10	6.8			12.5	6.25
	10.1	6.9			12.5	6.2
	10.1	6.95			12.5	6.1
	10.2	6.95			12.7	6.2
	10.2	7.05			12.7	6.1
	10.3	7.05			12.7	6.25
	10.3	6.95			12.8	6.25
	10.4	7.05			12.8	6.2
	10.4	6.95			12.8	6.1
	10.4	6.9			12.9	6.25
	10.8	6.95			12.9	6.2
	10.8	7.05			12.9	6.1
	10.8	6.9			12.9	6.05
	11.1	6.95			13.1	6
	11.2	6.95
	11.2	7.05
	11.2	7.1
	11.3	7.05
	11.3	7.1
	11.4	7.1
	11.4	7.2
	11.5	7.2
	11.6	7.2
	11.6	7.1
	11.6	7.05
	11.8	7.05
	11.8	7.1
	11.8	7.2
	11.8	7.25
	11.9	7.2
	11.9	7.1
	12	7.2
	12	7.1
	12	7.05
	12	6.9
	12	6.95
	12.4	6.95
	12.4	7.05
	12.4	7.1
	12.5	7.1
	12.6	7.1
	12.7	7.1
	12.8	7.2
	12.8	7.1
	12.8	7.05
	12.8	6.95
	13.2	7.1
	13.2	7.2
	13.2	7.05
	13.2	6.95
	13.3	7.05
	13.4	7.05
	13.4	7.1
	13.5	7.1
	13.6	7.1
	13.6	7.05
	13.6	6.95
	13.8	7.05
	13.8	7.1
	13.8	7.2
	13.9	7.2
	13.9	7.1
	14	7.1
	14	7.05
	14	6.95
	14.1	7.1
	14.2	7.2
	14.2	7.25
	14.4	7.25
	14.4	7.2
	14.4	7.1
	14.4	7.05
	14.4	6.95
	14.5	6.95
	14.5	6.8
	14.5	6.9
	14.6	6.8
	14.6	6.95
	14.6	6.9
	14.7	6.95
	14.7	6.9
	14.7	6.8
	14.8	6.9
	14.8	6.8
	14.8	6.75
	15.2	6.8
	15.2	6.9
	15.3	6.9
	15.3	6.8
	15.3	6.95
	15.4	6.9
	15.4	6.95
	15.6	6.95
	15.6	6.9
	15.6	6.8
	15.6	6.6
	15.6	6.55
	15.7	6.6
	15.7	6.7
	15.8	6.7
	15.8	6.75
	15.9	6.75
	15.9	6.6
	15.9	6.7
	16	6.7
	16	6.75
	16	6.6
	16.4	6.7
	16.4	6.6
	16.4	6.75
	16.8	6.75
	16.8	6.7
	16.8	6.6
	16.8	6.55
	16.9	6.6
	17	6.6
	17.2	6.7
	17.2	6.55
	17.2	6.6
	17.3	6.7
	17.3	6.6
	17.3	6.75
	17.4	6.75
	17.4	6.7
	17.5	6.7
	17.5	6.75
	17.5	6.6
	17.6	6.7
	17.6	6.6
	17.6	6.55
	17.7	6.6
	17.7	6.7
	17.8	6.7
	17.8	6.75
	17.9	6.8
	17.9	6.75
	17.9	6.7
	18	6.7
	18	6.6
	18	6.55
	18	6.45
	18.3	6.55
	18.3	6.45
	18.4	6.45
				I =	67500
				E =	#DIV/0!
